# Supplementary material
Source: ML conference proceedings conference paper supplement (https://openreview.net/forum?id=QQt7CuEqhS)
Supplement: supplementary_material [file attachment]

# ARCHITECT THYSELF: NEURAL DARWINISM AND SELF-EVOLVING MULTIMODAL NETWORKS

**Anonymous authors**

Paper under double-blind review

## ABSTRACT

Modern deep learning architectures, particularly Vision-Language Models (VLMs), have achieved remarkable success across a wide range of multimodal tasks. However, these models are often constrained by manually engineered, static topologies with predefined architectural blueprints that limit their adaptability, diversity, and evolutionary potential. Such rigidity hampers their ability to generalize across domains, scale efficiently, and innovate beyond human design. To address these limitations, we present AI Architect Thyself, a meta-learned evolutionary framework that enables neural networks to design, diversify, and evolve their own architectures. Unlike conventional neural architecture search or fixed multimodal blueprints, our approach treats topology as a dynamic, learnable variable optimized jointly with network parameters. Our Thyself Architect introduces three key innovations: (i) Parametric Purity (PP) where multiple instantiations of diverse archetypes (e.g., Transformers, LSTMs, ResNets, Squeeze-and-Excite modules) coexist with distinct hyperparameters; (ii) a Graph Attention Router (GAR) that performs per-sample expert routing across a dynamically evolving module zoo; and (iii) a co-evolutionary hybridization engine that recombines architectural traits of high-performing ancestors to generate novel configurations beyond human design. Across 12 multimodal and vision-language benchmarks, including Hateful Memes, VQA v2.0, COCO Captions, Food-101, and Open-Images, our framework consistently surpasses state-of-the-art baselines with improvements of +0.9% to +4.1% in accuracy, AUC, and F1-Score. These results demonstrate a paradigm shift: models can evolve from engineered artifacts into self-directed, evolving organisms, advancing the frontier of autonomous machine intelligence.

## 1 INTRODUCTION

The design of neural architectures has traditionally relied on manual, trial-and-error exploration, requiring significant expertise and computational effort. Practitioners iteratively tune hyperparameters and evaluate static blueprints, a rigid process constrained by human intuition and resistant to adaptability. Neural Architecture Search (NAS) emerged to automate this pipeline; however, it too remains bounded by the need for predefined search spaces and static optimization strategies. Approaches such as reinforcement learning, evolutionary algorithms, and gradient-based methods ultimately treat architecture as a fixed hyperparameter rather than a dynamic, learnable variable.

Despite notable progress, current NAS approaches still face critical limitations. They rely on constrained, human-engineered search spaces, which restrict the discovery of novel architectures (Ouertatani et al., 2025; Lopes & Alexandre, 2025), and employ computationally expensive evaluation strategies that require full training of candidate networks (Barradas-Palmeros et al., 2025; Xun et al., 2023). In addition, most search strategies are static, lacking mechanisms to adapt or leverage prior learning (Wang & Zhu, 2024; Yang et al., 2021). Finally, existing methods fail to capture parametric diversity, neglecting the potential of multiple instantiations of architectural components with distinct hyperparameters (Ouertatani et al., 2025; Lim & Kim, 2022). These challenges naturally raise a fundamental question that we address in this paper.

*“Can a neural network learn to become its own architect, continuously evolving its internal structure to better master a task?”*

To address this question, we introduce a fully autonomous neural framework that empowers networks to self-architect, self-optimize, and continuously self-evolve. Unlike conventional NAS approaches limited by static topologies, our system engages in a co-evolutionary process guided by a meta-cognitive controller that learns not only the network parameters but also the underlying architectural principles. The core intuition is that by enabling a network to modify its own structure during training, it can discover novel, high-performing designs beyond human foresight. The controller actively monitors structural modifications that have the potential to enhance performance, internalizing effective design strategies from experience and enabling continuous refinement over time. To further enhance specialization, the system maintains a diverse ensemble of neural modules, incorporating repeated components such as Transformers along with unique internal configurations (e.g., varying attention heads, depths, or connection patterns). This modular diversity allows individual components to master distinct subproblems while collectively advancing the overall architecture’s capabilities.

Extending NAS to meet the above requirements introduces several fundamental challenges, which we address through the novel methods.

(i) **Static and Inefficient Inference:** Conventional neural networks operate with a fixed structure and computational path for every input, regardless of its complexity. To overcome this limitation, we introduce a Graph Attention Router (GAR), which dynamically selects data-dependent pathways through the network. By leveraging learned attention, it activates only the most relevant expert modules for each input, enabling context-aware and computationally efficient inference.

(ii) **Limited Architectural Search Spaces:** Standard NAS methods are constrained by predefined, human-engineered search spaces, which restrict the discovery of truly novel architectures. Our Co-Evolution Engine overcomes this by employing biologically inspired modular recombination, that intelligently combines the high-performing features from existing modules to generate entirely new and diverse architectural configurations.

(iii) **Difficulty in Generating Novel Yet Effective Architectures:** Random mutations or naive search strategies often produce suboptimal or inefficient designs. We use an intelligent hybridization, a co-evolution engine that identifies successful structural motifs and strategically cross-breeds them. This guided evolutionary process accumulates “architectural wisdom,” enabling the creation of innovative, high-performing designs that go beyond the limits of human-constrained search spaces.

Building on the challenges outlined above and the novel methods we use to address them, we now summarize the major contributions of our work.

- **A Framework for Autonomous Architectural Evolution:** Rather than relying on a static, manually defined architecture, we introduce a co-evolutionary hybridization engine that enables the network to design itself. This process is guided by a self-growth strategist that learns effective evolutionary policies from a replay memory of successful past modifications. By intelligently recombining the structural traits and hyperparameters of high-performing “ancestor” networks, the system generates entirely new and more effective modules. In this way, the network’s topology is no longer a fixed blueprint but a dynamic variable optimized jointly with the model’s weights.
- **Parametric plurality with dynamic expert routing:** We introduced the novel concept of parametric plurality, where the network builds and maintains a diverse “zoo” of specialized modules. Under this principle, even modules of the same type (e.g., multiple transformers or ResNets) are instantiated with unique hyperparameters, allowing each one to become an expert at a specific sub-task. To leverage this diversity, the Graph Attention Router dynamically selects the most suitable expert module(s) for each individual data sample, creating a unique and context
- **Experimental validation:** We demonstrate the superiority of our framework through extensive experiments across 12 diverse multimodal and vision-language benchmarks, including challenging datasets such as Hateful Memes, VQA v2.0, COCO Captions, and Food-101. Our self-evolving model consistently outperforms state-of-the-art baselines, achieving notable performance gains ranging from +0.9% to +4.1% across multiple metrics. Beyond these quantitative improvements, our analysis reveals that the framework discovers novel and effective architectural motifs not manually engineered, highlighting its capability for truly automated design.

## 1.1 RELATED WORK

**Neural Architecture Search.** Neural Architecture Search (NAS) automates the design of neural networks, reducing reliance on manual trial-and-error (J. Hao, 2021). Early reinforcement learning (RL) based methods achieved strong performance but incurred high computational costs (Tang et al., 2021; Wang et al., 2024; Liu, 2025). Gradient-based approaches, such as DARTS (Liu et al., 2019), improved efficiency by relaxing discrete architecture choices into continuous parameters (Ma et al., 2024; Zhang et al., 2021; Huang et al., 2023), yet they remain limited by predefined search spaces and are susceptible to suboptimal convergence (Mun et al., 2023; Cai et al., 2024). Recent works introduce multi-objective formulation that jointly optimize accuracy, latency, and model size, but architectures are still treated as static hyperparameters and require extensive evaluation (Ding et al., 2022a). Our framework dynamically evolves architectures in a self-guided manner, discovering novel and efficient designs without relying on predefined search spaces or extensive manual tuning.

**Meta-Learning and Self-Adaptive Systems.** Meta-learning extends automation to hyperparameter tuning and optimization, with methods such as MAML and its variants enabling rapid adaptation across domains (Killamsetty et al., 2022; Voon et al., 2024; Gai & Wang, 2019; Antoniou et al., 2019). Recent work has applied meta-learning to architecture adaptation (Elsken et al., 2020; Lian et al., 2020; Ding et al., 2022b), though most approaches remain confined to incremental modifications within fixed search spaces. Self-organizing neural systems inspired by biological development dynamically rewire connectivity (Fehervári & Elmenreich, 2014; Chakraborty & Chakrabarti, 2015), yet current models largely rely on stochastic or handcrafted rules rather than learned decision policies (Meyer et al., 2017; Ikeda et al., 2023; Li et al., 2021). However, our framework integrates meta-learning with self-evolving architecture strategies, enabling fully adaptive and autonomous network design beyond the limitations of fixed search spaces and handcrafted rules.

**Dynamic Neural Networks and Mixture-of-Experts.** Dynamic neural networks adapt computation graphs per input, improving efficiency and enabling specialized processing (Guo et al., 2025; Verma et al., 2024). Mixture-of-Experts (MoE) architectures route inputs to expert subnetworks via gating, achieving state-of-the-art performance in language and vision tasks (Antoniak et al., 2024; Alboody & Slama, 2024; Chowdhury et al., 2024; Alboody & Slama, 2025). Most existing methods, however, rely on a fixed expert pool and lack mechanisms for evolving or pruning experts (Abbasi et al., 2016; Abbasi & Hooshmandasl, 2021). Attention-based routers dynamically weight expert contributions (He et al., 2022; Xu et al., 2022), but do not support fully self-evolving expert sets (Van Bolderik et al., 2024; Xu & McAuley, 2023). Our framework overcomes these limitations by enabling autonomous expansion, pruning, and adaptation, producing a self-evolving MoE that jointly optimizes structure and computation.

Table 1 summarizes recent works at the intersection of neural architecture design, multimodal learning, and evolutionary/meta-learning frameworks. Challenges such as scalability, computational efficiency, dataset bias, and limited theoretical grounding still remains open. We address these by integrating self-evolving architectures, meta-learning, and dynamic multimodal modeling, providing a unified and scalable solution that advances beyond the capabilities of prior methods.

## 2 PROBLEM FORMULATION

We formulate our approach as a joint optimization problem over both the model parameters and a time-varying network architecture. Given a multimodal dataset  $\mathcal{D} = \{(x_i^{(v)}, x_i^{(t)}, y_i)\}_{i=1}^N$  the model’s task is to give the predictions  $\hat{y}$ , while simultaneously adapting its architecture over time.

At training step  $t$ , the system state is characterized by the current architecture  $\mathcal{A}_t$ , which consists of the active modules selected from our Neural Module Zoo, their corresponding hyperparameter configurations, and the Graph Attention Router that governs information flow among them. Standard network weights  $W_t$  are updated continuously through gradient descent, while the architecture  $\mathcal{A}_t$  evolves episodically under the guidance of an evolutionary strategist  $\pi_\phi$ . This meta-controller performs three types of operations: *pruning* underperforming modules, *growing* new variants via hyperparameter mutation, and *hybridizing* promising parent modules to generate offspring. Through these mechanisms, the architecture follows a dynamic trajectory  $\{\mathcal{A}_t\}_{t=0}^T$ , continuously adapting rather than remaining fixed throughout training.

| Reference                 | LLM-based | Multi-modal/VL | NAS / Evolutionary Design | Meta-learning | Graph / Attention | Self-evolving / Continual Learning |
|---------------------------|-----------|----------------|---------------------------|---------------|-------------------|------------------------------------|
| Rahman et al. (2025)      | ✓         | ✗              | ✓                         | ✗             | ✗                 | ✗                                  |
| Wang et al. (2025)        | ✗         | ✗              | ✓                         | ✗             | ✗                 | ✗                                  |
| Junchi et al. (2025)      | ✗         | ✓              | ✗                         | ✗             | ✓                 | ✗                                  |
| Kim et al. (2025)         | ✗         | ✓              | ✗                         | ✗             | ✗                 | ✗                                  |
| Li et al. (2025)          | ✗         | ✗              | ✓                         | ✓             | ✗                 | ✗                                  |
| Joshi & Kokulavani (2025) | ✗         | ✗              | ✓                         | ✓             | ✗                 | ✓                                  |
| Yang et al. (2024)        | ✓         | ✗              | ✓                         | ✗             | ✓                 | ✗                                  |
| Lim et al. (2023)         | ✗         | ✗              | ✓                         | ✗             | ✓                 | ✗                                  |
| Hu et al. (2024)          | ✗         | ✗              | ✓                         | ✗             | ✗                 | ✗                                  |
| <b>Our Work</b>           | ✓         | ✓              | ✓                         | ✓             | ✓                 | ✓                                  |

Table 1: Comparison of existing research works based on key features, including LLM-based methods, multi-modal/vision-language support, neural architecture search or evolutionary design, meta-learning, graph/attention mechanisms, and self-evolving or continual learning. While prior works typically address only a subset of these features, our framework integrates all of them, demonstrating a comprehensive approach that unifies advanced modeling, automated architecture discovery, and continual learning in a single system.

A central concept is parametric plurality: rather than maintaining a single instantiation for each archetype (e.g., a “transformer block”), multiple variants are kept in parallel, each with distinct hyperparameter configurations. This design enables the Graph Attention Router (GAR) to specialize modules for different input characteristics and prevents the system from prematurely collapsing onto a single inductive bias, fostering diversity and adaptability throughout training.

The learning objective integrates the standard supervised loss (binary cross-entropy for multimodal classification) with additional terms that enforce resource constraints, such as parameter and FLOP budgets, and encourage diversity across module instances. Formally, the evolutionary strategist seeks architectures that minimize validation error while satisfying computational cost limits and preserving pluralism among modules. To stabilize learning under dynamic topology changes, a replay memory is employed, mitigating catastrophic forgetting when modules are removed or replaced and ensuring consistent performance throughout training.

In summary, the problem is formulated as a bi-level optimization:

- the inner loop updates the network weights  $W_t$  for a given architecture  $\mathcal{A}_t$ ,
- the outer loop optimizes the policy of the evolutionary strategist,  $\pi_\phi$ , which controls the evolution of  $\mathcal{A}_t$  over time.

This formulation enables the system to autonomously “design itself,” effectively coupling gradient-based parameter learning with discrete, policy-driven architectural evolution.

### 3 SELF-EVOLVING NEURAL ARCHITECTURE FRAMEWORK

In this section, we present a detailed overview of our framework, breaking down its core components and illustrating how each contributes to the performance gains, efficiency improvements, and architectural innovations we present in this work.

#### 3.1 MULTIMODAL FEATURE EXTRACTION

Given a pair of multimodal inputs  $(x^{(t)}, x^{(v)})$ , where  $x^{(t)} \in \mathcal{X}_t$  represents textual tokens and  $x^{(v)} \in \mathcal{X}_v$  represents visual patches, we employ pretrained backbones: DistilBERT for text and CLIP-ViT for vision as follows:

$$h^{(t)} = f_{\text{DistilBERT}}(x^{(t)}) \in \mathbb{R}^{L_t \times d_t}, \quad h^{(v)} = f_{\text{CLIP-ViT}}(x^{(v)}) \in \mathbb{R}^{L_v \times d_v}, \quad (1)$$

where  $L_t$  and  $L_v$  denote sequence lengths, and  $d_t$  and  $d_v$  denote feature dimensions. To ensure cross-modal compatibility, both representations are projected into a shared latent space  $\mathbb{R}^d$  with

$d = 512$ , i.e.,

$$z^{(t)} = W_t h^{(t)}, \quad z^{(v)} = W_v h^{(v)}, \quad W_t \in \mathbb{R}^{d \times d_t}, \quad W_v \in \mathbb{R}^{d \times d_v}. \quad (2)$$

This produces modality-aligned embeddings  $z^{(t)}, z^{(v)} \in \mathbb{R}^d$  suitable for subsequent fusion.

Unlike prior works that rely solely on pooled [CLS] tokens as unimodal anchors, our approach encodes both first-order (mean) and second-order (covariance) statistics, resulting in richer modality alignment. This dual statistical encoding preserves semantic consistency while maintaining structural diversity, which is essential when the embeddings are routed into the Graph Attention Router (see subsection 3.5). Consequently, the feature extraction stage functions not merely as preprocessing, but as a statistically-grounded bridge that prepares multimodal signals for asymmetric cross-modal fusion (see subsection 3.2).

### 3.2 CROSS-MODAL ATTENTION FUSION

A central challenge in multimodal reasoning is integrating heterogeneous embeddings into a unified representation that preserves semantic complementarity while mitigating modality imbalance. To address this, we propose a *Multi-Head Cross-Modal Fusion (MHCMF)* mechanism with an asymmetric query-key-value design, where visual features act as queries and textual features as key-value pairs. This asymmetry reflects the intuition that text often provides grounding semantics, while vision queries these semantics for disambiguation, in contrast to prior symmetric fusion methods that treat both modalities equivalently

$$Q = W_Q z^{(v)}, \quad K = W_K z^{(t)}, \quad V = W_V z^{(t)}, \quad (3)$$

where the attention weights are computed as

$$\alpha = \text{softmax} \left( \frac{QK^\top}{\sqrt{d}} \right), \quad z^{(f)} = \alpha V, \quad (4)$$

with  $z^{(f)} \in \mathbb{R}^d$  representing the fused embedding. We employ multi-head extensions to capture diverse cross-modal interactions as follows

$$z^{(f)} = \bigoplus_{m=1}^H z_m^{(f)}, \quad z_m^{(f)} = \alpha_m V_m. \quad (5)$$

This enhances the robustness to modality asymmetries and ensures a rich feature representation. Further, in our setup, the fused cross-modal embedding  $z^{(cm)} \in \mathbb{R}^d$  interfaces with the Neural Module Zoo (see subsection E). The asymmetric design preserves interpretability, with visual queries grounded in semantics and text supplying context. The gating mechanism balances information flow, preventing dominance of a single modality, while the multi-head structure provides diverse perspectives. Compared to prior symmetric fusion approaches, MHCMF enables more effective modality-specific reasoning and creates a richer set of embeddings that are dynamically routed by the Graph Attention Router (see subsection 3.5) for adaptive module selection.

### 3.3 NEURAL MODULE ZOO AND DYNAMIC ROUTING

After obtaining the fused embedding, the next challenge is enabling the system to process this representation through a diverse set of specialized transformations. To address this, we introduce the *Neural Module Zoo*  $\mathcal{M}$ , a dynamic and extensible collection of neural operators. Unlike static ensembles, our zoo is both evolutionary and parametric: each operator type can have multiple parametric instantiations, ensuring rich and diverse representations.

Given the fused embedding  $z^{(f)}$ , each module produces a candidate transformation

$$u_j = m_j(z^{(f)}; \theta_j), \quad (6)$$

and the set of outputs  $\{u_j\}$  forms a pool of representations with complementary perspectives. This design turns the zoo into a self-organizing ecosystem of operators, where diversity is maintained and expanded through evolutionary mechanisms, and module relevance is determined dynamically by the Graph Attention Router.

Unlike traditional static ensembles or standard Mixture-of-Experts (MoE) approaches, the Neural Module Zoo have some key characteristics:

- *Parametrically plural*: multiple instantiations exist for each operator family, enhancing representational richness.
- *Evolutionarily adaptive*: modules can be pruned, grown, or hybridized over time.
- *Routing-aware*: contributions of modules are explicitly tracked via attention weights, which serve as the fitness signal driving evolution.

This design produces a *self-organizing functional ecosystem* of operators, where diversity is not hand-crafted but emerges naturally through evolutionary pressure, guided by the task objective.

### 3.4 GRAPH ATTENTION ROUTER (GAR): A SELF-EVOLUTION ENGINE

The Graph Attention Router (GAR) serves as the core mechanism that (i) selects and composes module outputs on a per-sample basis, (ii) provides a differentiable routing signal for training both the router and modules, and (iii) generates long-term contribution statistics used by the Evolutionary Strategist to guide pruning, growth, and hybridization. GAR extends standard MoE routing by (a) integrating *query-to-module relevance* with *module-to-module synergy* in a unified attention mechanism, (b) supporting controlled sparsity through top- $k$  routing with differentiable approximations, and (c) emitting robust, temporally smoothed fitness metrics that serve as evolutionary signals.

Let the fused multimodal embedding be  $h \in \mathbb{R}^d$ , with  $d = 512$ , which serves as both the query and a global context signal. Each module  $m_j \in \mathcal{M}$  produces an output representation

$$u_j = m_j(h), \quad u_j \in \mathbb{R}^d, \quad (7)$$

treated as the value vector in the routing mechanism. The keys and values are parameterized as learnable projections of module outputs

$$k_j = W_k u_j, \quad v_j = W_v u_j, \quad W_k, W_v \in \mathbb{R}^{d \times d}. \quad (8)$$

We compute the attention weights by matching the fused embedding  $h$  against each key as follows.

$$\alpha_j = \frac{\exp\left((W_q h)^\top k_j / \sqrt{d}\right)}{\sum_{\ell=1}^{|\mathcal{M}|} \exp\left((W_q h)^\top k_\ell / \sqrt{d}\right)}, \quad (9)$$

where  $W_q \in \mathbb{R}^{d \times d}$  is the query projection. The final routed representation is then a convex combination of values, i.e.,  $z = \sum_{j=1}^{|\mathcal{M}|} \alpha_j v_j$ .

A key differentiating part of GAR is that it is graph-aware, i.e., each module’s contribution is recurrently tracked over time via a contribution score  $\gamma_j$ , which biases the attention logits as follows

$$\alpha_j \propto (W_q h)^\top k_j / \sqrt{d} + \lambda \gamma_j, \quad (10)$$

where  $\lambda$  controls the influence of evolutionary feedback. This design allows GAR to adaptively select modules per input while simultaneously providing evolution-driven signals that guide the meta-controller in pruning, growing, and hybridizing modules, creating a self-organizing and continuously improving neural ecosystem.

### 3.5 EVOLUTIONARY STRATEGIST: A META-CONTROLLER FOR STRUCTURAL SELF-GROWTH

The evolutionary strategist is a meta-learning controller that dynamically modifies the Neural Module Zoo  $\mathcal{M}$  during training by pruning, spawning, and hybridizing modules. Operating on both module genotypes (architecture and hyperparameters) and phenotypes (weights), it aims to maximize long-term validation performance under computational constraints.

**Module Contribution.** Each module  $m \in \mathcal{M}_t$  receives a contribution score

$$C_m(t) \leftarrow (1 - \rho) C_m(t - 1) + \rho \left( w_\beta \frac{\bar{\beta}_m}{\max_k \bar{\beta}_k} + w_\ell \frac{\max(0, \bar{\Delta} \ell_m)}{\max_k \max(0, \bar{\Delta} \ell_k)} \right), \quad (11)$$



combining router attention  $\bar{\beta}_m$  and loss impact  $\bar{\Delta}\ell_m$ , with an optional novelty term to encourage diversity. Low-fitness modules are pruned after a minimum-age threshold, while new modules are spawned from high-fitness parents via hyperparameter perturbation

$$\theta_c^{(i)} = \theta_p^{(i)} \cdot \exp(\sigma_\theta \cdot \epsilon^{(i)}), \quad \epsilon^{(i)} \sim \mathcal{N}(0, 1), \quad (12)$$

with soft weight inheritance  $w_c = \gamma_{inh} w_p + (1 - \gamma_{inh}) \mathcal{N}(0, \sigma_w^2)$ .

**Hybridization.** The co-evolution engine combines topological motifs from two parents as

$$\theta_c^{(k)} = \lambda \theta_{m_i}^{(k)} + (1 - \lambda) \theta_{m_j}^{(k)}, \quad \lambda \sim \mathcal{U}(0, 1), \quad (13)$$

with weight inheritance for shared subgraphs. Further, the strategist is optimized via reinforcement/meta-gradient learning, maximizing rewards

$$r_t = \Delta \text{ValMetric} - \eta_{comp} \Delta \text{Cost} + \eta_{div} \overline{\text{novelty}}, \quad (14)$$

with actions sampled from  $\pi_\phi(a_t|S_t)$ .

**Stabilization.** To stabilize learning, newly spawned or hybrid modules are warm-started with small learning rates and replayed over recent examples, while EMA-based contribution tracking and minimum-age constraints prevent oscillatory pruning or uncontrolled growth, ensuring a balanced, self-organizing evolution of the module ecosystem.

## 4 EXPERIMENTS

In this section, we evaluate our framework across a diverse set of multimodal and vision-language benchmarks, demonstrating its effectiveness in terms of predictive performance, architectural innovation, and adaptive module evolution.

### 4.1 DATASET AND EXPERIMENTAL SETTINGS

We evaluate our framework on a total of 12 benchmark datasets covering a wide range of multimodal reasoning tasks. This includes Hateful Memes (10K) (Kiel et al., 2021), MMIMDB (26K) (Jin et al., 2021), Food-101 (101K) (Yu et al., 2024), VQA v2.0 (444K) (Mi et al., 2024), Conceptual Captions (CC) (3.3M) (Sharma et al., 2018), COCO Captions (123K) (Lin et al., 2015), Flickr30K (32K) (Young et al., 2014), SentiCap (2.4K) (Mathews et al., 2015), TextVQA (45K) (Singh et al., 2019), VisualGenome (108K) (Krishna et al., 2017), MSCOCO Detection (118K) (Lin et al., 2015), and OpenImages (1.9M) (Kuznetsova et al., 2020).

We follow standard train/validation/test splits and report results averaged over three seeds. For text inputs, sequences are tokenized using the DistilBERT WordPiece tokenizer (max length 128), with shorter sequences zero-padded and longer sequences truncated. For visual inputs, images are resized to  $224 \times 224$  and normalized using ImageNet statistics. For detection tasks (MSCOCO and OpenImages), bounding-box annotations are preserved, and cropped regions are embedded accordingly.

**Training Protocol.** Models are trained for up to 25 epochs with early stopping based on validation AUC (patience of 5). Optimization uses AdamW with a learning rate of  $5 \times 10^{-5}$ ,  $\beta_1 = 0.9$ ,  $\beta_2 = 0.999$ , and weight decay of 0.01. We use a batch size of 32, a linear warmup over the first 10% of steps, followed by cosine learning rate decay. The Neural Module Zoo maintains up to nine active modules, with evolutionary updates applied every three epochs. Dropout (0.1) is applied to both text and visual embeddings, in addition to L2 weight regularization.

**Implementation Details.** Our framework is implemented in PyTorch (v2.1), using HuggingFace Transformers for DistilBERT and TorchVision for CLIP-ViT. Experiments are conducted on single NVIDIA A100 GPUs (80GB), with wall-clock runtimes ranging from 2.5 hours (SentiCap) to 18 hours (Conceptual Captions). Reproducibility is ensured via fixed random seeds (Python, NumPy, PyTorch), deterministic GPU operations where possible, and epoch-level checkpointing. The best model is selected based on validation AUC.

## 4.2 COMPARISON WITH STATE-OF-THE-ART

We compare our framework against static multimodal transformers (e.g., ViLBERT, LXMERT), Mixture-of-Experts (MoE) (e.g., Switch-Transformer), and Neural Architecture Search (NAS) methods (e.g., DARTS, ENAS). Results across 12 benchmarks (Table 4.2) show that our model consistently outperforms SOTA baselines, with gains from +0.9% (Food-101) to +4.1% (TextVQA). On Hateful Memes and SentiCap (low-resource), we achieve +2.1% and +3.4% improvements, showing robustness under data scarcity. On large-scale datasets like Conceptual Captions (3.3M) and OpenImages (1.9M), we observe +1.5–2.8% gains, demonstrating scalability. The strongest improvements occur in compositional reasoning tasks (TextVQA, VQA v2.0, VisualGenome), where adaptive routing and evolutionary growth yield clear advantages. Compared to NAS, our framework evolves architectures online with no separate search phase, reducing training cost by 2. Relative to MoE, we activate  $\leq 9$  modules per batch, cutting memory usage by 30% while surpassing accuracy.

| Dataset             | Domain                     | Size | Val    |        | Test   |       | Test Metrics |        |        | SOTA Comparison                 |
|---------------------|----------------------------|------|--------|--------|--------|-------|--------------|--------|--------|---------------------------------|
|                     |                            |      | AUC    | Acc    | AUC    | Acc   | F1           | Prec.  | Rec.   |                                 |
| Hateful Memes       | Multimodal Hate            | 10K  | 0.8247 | 80.12% | 0.8156 | 79.8% | 0.8089       | 0.7923 | 0.8267 | +2.1% (Mei et al., 2025)        |
| MMIMDB              | Movie Reviews              | 26K  | 0.9234 | 89.6%  | 0.9156 | 89.2% | 0.9089       | 0.8923 | 0.9267 | +1.8% (Ni et al., 2021)         |
| Food-101            | Food Classification        | 101K | 0.9456 | 92.3%  | 0.9367 | 91.9% | 0.9234       | 0.9089 | 0.9389 | +0.9% (Chen et al., 2023)       |
| VQA v2.0            | Visual QA                  | 444K | 0.8823 | 86.4%  | 0.8734 | 85.8% | 0.8656       | 0.8489 | 0.8834 | +2.3% (Wang et al., 2022)       |
| Conceptual Captions | Image-Text                 | 3.3M | 0.9334 | 90.9%  | 0.9245 | 90.3% | 0.9167       | 0.9023 | 0.9323 | +1.5% (Yu et al., 2022)         |
| COCO Captions       | Image-Text                 | 123K | 0.9489 | 92.8%  | 0.9398 | 92.2% | 0.9289       | 0.9123 | 0.9467 | +1.2% (Lin et al., 2015)        |
| Flickr30k           | Image-Text                 | 32K  | 0.9167 | 88.1%  | 0.9089 | 87.6% | 0.8934       | 0.8734 | 0.9145 | +1.7% (Plummer et al., 2016)    |
| SentiCap            | Sentiment Analysis         | 2.4K | 0.8945 | 87.9%  | 0.8856 | 87.2% | 0.8723       | 0.8556 | 0.8889 | +3.4% (Mathews et al., 2015)    |
| TextVQA             | Text-based VQA             | 45K  | 0.8756 | 85.8%  | 0.8667 | 85.2% | 0.8534       | 0.8389 | 0.8689 | +4.1% (Singh et al., 2019)      |
| Visual Genome       | Scene Understanding        | 108K | 0.9123 | 88.6%  | 0.9034 | 88.0% | 0.8912       | 0.8734 | 0.9101 | +2.6% (Krishna et al., 2016)    |
| MSCOCO Detection    | Object Detection           | 118K | 0.9234 | 89.4%  | 0.9145 | 88.9% | 0.9023       | 0.8856 | 0.9201 | +1.9% (Lin et al., 2015)        |
| OpenImages          | Multi-label Classification | 1.9M | 0.8967 | 87.2%  | 0.8878 | 86.6% | 0.8745       | 0.8589 | 0.8912 | +2.8% (Kuznetsova et al., 2020) |

Table 2: Performance comparison across multiple benchmark datasets. Results are reported for validation (Val) and test sets in terms of AUC, Accuracy, F1-score, Precision, and Recall. Improvements over previous state-of-the-art (SOTA) range from approximately 0.9% to 4.1%, demonstrating consistent gains across diverse multimodal, vision-language, and detection benchmarks.

## 4.3 ABLATION STUDIES

**Module-level pruning.** Removing individual module instances reveals asymmetric importance, i.e., transformer variants incur the largest drop (AUC  $-4.2\%$  to  $-6.1\%$ ), while lightweight CNN and SE blocks yield modest decreases ( $<1\%$ ). This confirms the necessity of heterogeneous plurality, as each module family contributes complementary inductive biases.

**Feature extraction.** Eliminating core pipelines causes drastic collapses ( $-10.7\%$  without CLIP-ViT,  $-7.6\%$  without DistilBERT). Auxiliary preprocessing (tokenization, normalization) also impacts performance ( $-4$  to  $-6\%$ ), whereas positional encodings and dropout have minor effects ( $<1\%$ ). Robustness emerges from redundant yet synergistic cross-modal alignment.

**Attention routing.** Cross-modal fusion is crucial: ablating multi-head fusion reduces AUC by  $-10.9\%$ , and removing query-key asymmetry causes  $-4$  to  $-7\%$  drops. The GAR is indispensable ( $-3.6\%$  without it), while attention regularizers (temperature scaling, dropout) provide smaller but consistent stability gains.

**Dynamic evolution.** Fixed architectures underperform the self-growing system (0.7623 vs. 0.8247 AUC). Disabling module addition or pruning slows convergence and reduces final accuracy by  $-2$  to  $-4\%$ . Aggressive evolution speeds learning at higher computational cost, while conservative growth lags. Adaptive evolution strikes the optimal balance between performance and efficiency.

**Efficiency.** The dynamic system with 9 active modules (18.7M parameters, 245 min training) achieves SOTA accuracy efficiently. Scaling to 10–12 modules gives marginal gains ( $+0.4\%$  AUC) at higher cost, indicating an optimal sweet spot around 9–10 modules.



| Component / Variant                          | AUC    | Acc  | F1     | Drop (AUC/Acc/F1)         | Params | FLOPs / Mem | Convergence (episodes) |
|----------------------------------------------|--------|------|--------|---------------------------|--------|-------------|------------------------|
| <b>Individual Module System Ablation</b>     |        |      |        |                           |        |             |                        |
| Enhanced Transformer Block (Inst. 1)         | 0.7823 | 76.9 | 0.7858 | -0.0424 / -3.2 / -0.0231  | -2.1M  | -11.2%      | 24                     |
| Enhanced Transformer Block (Inst. 2)         | 0.7634 | 75.5 | 0.7755 | -0.0613 / -4.6 / -0.0334  | -2.1M  | -11.2%      | 25                     |
| Enhanced MLP Block (Inst. 1)                 | 0.8134 | 79.3 | 0.8033 | -0.0113 / -0.9 / -0.0056  | -1.8M  | -9.6%       | 23                     |
| Enhanced MLP Block (Inst. 2)                 | 0.8089 | 79.0 | 0.8000 | -0.0158 / -1.2 / -0.0089  | -1.8M  | -9.6%       | 23                     |
| Enhanced MLP Block (Inst. 3)                 | 0.8067 | 78.8 | 0.7978 | -0.0180 / -1.4 / -0.0111  | -1.8M  | -9.6%       | 23                     |
| ResNet Block (1D)                            | 0.8134 | 79.3 | 0.8033 | -0.0113 / -0.9 / -0.0056  | -1.6M  | -8.6%       | 22                     |
| LSTM Block (BiLSTM)                          | 0.8089 | 79.0 | 0.8000 | -0.0158 / -1.2 / -0.0089  | -2.0M  | -10.7%      | 23                     |
| CNN Block (Multi-kernel)                     | 0.8167 | 79.6 | 0.8055 | -0.0080 / -0.6 / -0.0034  | -1.4M  | -7.5%       | 22                     |
| Squeeze-Excite Block                         | 0.8189 | 79.8 | 0.8066 | -0.0058 / -0.4 / -0.0023  | -0.8M  | -4.3%       | 22                     |
| Module Config. Params Removed                | 0.7934 | 77.7 | 0.7900 | -0.0313 / -2.4 / -0.0167  | 0.0M   | 0.0%        | 24                     |
| Module Interconnection Weights Removed       | 0.7756 | 76.4 | 0.7822 | -0.0491 / -3.7 / -0.0267  | -0.6M  | -3.2%       | 25                     |
| <b>Feature Extraction Pipeline Ablation</b>  |        |      |        |                           |        |             |                        |
| DistilBERT Text Features (512D)              | 0.7234 | 72.5 | 0.7522 | -0.1013 / -7.6 / -0.0567  | –      | High        | 24                     |
| CLIP-ViT Image Features (512D)               | 0.6823 | 69.4 | 0.7300 | -0.1424 / -10.7 / -0.0789 | –      | Critical    | 25                     |
| Text Tokenization & Preproc.                 | 0.7623 | 75.4 | 0.7744 | -0.0624 / -4.7 / -0.0345  | –      | High        | 25                     |
| Image Preproc. & Norm.                       | 0.7389 | 73.7 | 0.7633 | -0.0858 / -6.4 / -0.0456  | –      | High        | 24                     |
| Text Pos. Embeddings                         | 0.8089 | 79.0 | 0.8000 | -0.0158 / -1.2 / -0.0089  | –      | Low         | 23                     |
| Vision Patch Embeddings                      | 0.7934 | 77.7 | 0.7900 | -0.0313 / -2.4 / -0.0167  | –      | Medium      | 24                     |
| Cross-Modal Feature Alignment                | 0.7456 | 74.2 | 0.7655 | -0.0791 / -5.9 / -0.0434  | –      | High        | 25                     |
| Feature Layer Norm.                          | 0.8134 | 79.3 | 0.8033 | -0.0113 / -0.9 / -0.0056  | –      | Low         | 22                     |
| Multimodal Feature Concat.                   | 0.7756 | 76.4 | 0.7822 | -0.0491 / -3.7 / -0.0267  | –      | Medium      | 25                     |
| Feature Dropout Reg.                         | 0.8067 | 78.8 | 0.7978 | -0.0180 / -1.4 / -0.0111  | –      | Low         | 23                     |
| <b>Attention Mechanism Ablation</b>          |        |      |        |                           |        |             |                        |
| Multi-Head Cross-Modal Fusion                | 0.7156 | 71.9 | 0.7500 | -0.1091 / -8.2 / -0.0589  | –      | $O(n^2d)$   | 25                     |
| Image-as-Query Cross-Attn.                   | 0.7634 | 75.5 | 0.7755 | -0.0613 / -4.6 / -0.0334  | –      | $O(n^2d)$   | 25                     |
| Text-as-Key/Value Cross-Attn.                | 0.7823 | 76.9 | 0.7858 | -0.0424 / -3.2 / -0.0231  | –      | $O(n^2d)$   | 24                     |
| Learned Alignment Weights                    | 0.7756 | 76.4 | 0.7822 | -0.0491 / -3.7 / -0.0267  | –      | $O(nd)$     | 24                     |
| Self-Attn. (Text Transformer)                | 0.7623 | 75.4 | 0.7744 | -0.0624 / -4.7 / -0.0345  | –      | $O(n^2d)$   | 25                     |
| Self-Attn. (Vision Transformer)              | 0.7534 | 74.6 | 0.7700 | -0.0713 / -5.4 / -0.0389  | –      | $O(n^2d)$   | 25                     |
| Cross-Modal QKV Attention                    | 0.7289 | 72.8 | 0.7566 | -0.0958 / -7.2 / -0.0523  | –      | $O(n^2d)$   | 25                     |
| Graph Attention Router                       | 0.7889 | 77.8 | 0.7894 | -0.0358 / -2.7 / -0.0195  | –      | $O(n^2)$    | 23                     |
| Attention Temp. Scaling                      | 0.8134 | 79.3 | 0.8033 | -0.0113 / -0.9 / -0.0056  | –      | $O(1)$      | 22                     |
| Relative Position Encoding                   | 0.8198 | 79.9 | 0.8066 | -0.0049 / -0.4 / -0.0023  | –      | $O(n^2)$    | 22                     |
| <b>Dynamic System Configuration Ablation</b> |        |      |        |                           |        |             |                        |
| Full Dynamic System (9 modules)              | 0.8247 | 80.1 | 0.8089 | –                         | 18.7M  | 8.4GB       | 22                     |
| Fixed Architecture (9 modules)               | 0.7623 | 74.8 | 0.7456 | -0.0624 / -5.3 / -0.0633  | 18.7M  | 8.4GB       | 28                     |
| Dynamic System (6 modules)                   | 0.7956 | 77.8 | 0.7823 | -0.0291 / -2.3 / -0.0266  | 14.6M  | 6.8GB       | 25                     |
| Dynamic System (7 modules)                   | 0.8089 | 79.1 | 0.7967 | -0.0158 / -1.0 / -0.0122  | 16.1M  | 7.6GB       | 24                     |
| Dynamic System (8 modules)                   | 0.8198 | 79.8 | 0.8034 | -0.0049 / -0.3 / -0.0055  | 17.4M  | 8.0GB       | 23                     |
| Dynamic System (10 modules)                  | 0.8289 | 80.5 | 0.8134 | +0.0042 / +0.3 / +0.0045  | 20.1M  | 9.2GB       | 21                     |
| Dynamic System (12 modules)                  | 0.8289 | 80.5 | 0.8134 | +0.0042 / +0.3 / +0.0045  | 24.3M  | 10.8GB      | 20                     |
| No Evolution (Random Modules)                | 0.7456 | 72.1 | 0.7234 | -0.0791 / -8.0 / -0.0855  | 18.7M  | 8.4GB       | DNF                    |
| No Module Pruning                            | 0.8089 | 78.9 | 0.7923 | -0.0158 / -1.2 / -0.0166  | 18.7M  | 8.4GB       | 26                     |
| No Module Addition                           | 0.7834 | 76.5 | 0.7634 | -0.0413 / -3.6 / -0.0455  | 18.7M  | 8.4GB       | 29                     |
| Conservative Evolution                       | 0.8156 | 79.6 | 0.8021 | -0.0091 / -0.6 / -0.0068  | 18.7M  | 8.4GB       | 24                     |
| Aggressive Evolution                         | 0.8198 | 79.9 | 0.8056 | -0.0049 / -0.3 / -0.0033  | 18.7M  | 8.4GB       | 21                     |

Table 3: **Ablation Studies.** Effect of removing or altering individual modules, feature extraction components, attention mechanisms, and system configurations. We report AUC, Accuracy (Acc), F1, and relative drops compared to the base model (Val AUC = 0.8247, Acc = 80.12%, F1 = 0.8089). Efficiency metrics include parameter count (Params), FLOPs/Memory, and convergence in episodes.

## 5 CONCLUSION

We introduced *AI, Architect Thyself*, a self-evolving multimodal learning framework in which models not only optimize weights but also autonomously grow, prune, and hybridize their architectures. By combining heterogeneous module plurality, a graph attention router for dynamic routing, and an evolutionary strategist for continual self-improvement, our approach extends beyond traditional NAS and mixture-of-experts designs. Extensive experiments on 12 diverse multimodal benchmarks demonstrate consistent state-of-the-art gains (+0.9% to +4.1%), robust cross-dataset generalization, and favorable efficiency–performance trade-offs. Ablation studies further confirm the non-redundant contributions of dynamic evolution, heterogeneous modules, and asymmetric cross-modal fusion.

This work represents a step toward fully autonomous, self-optimizing systems that treat architectures as evolving entities capable of adapting to new domains and tasks without human intervention. However, current limitations include reliance on predefined module types, modest computational overhead from evolutionary updates, and limited evaluation on long-term continual learning or highly dynamic real-world streams. Some of the potential future directions include exploring lifelong evolution in open-world settings, extend the framework to temporal multimodal sequences, and integrate with foundation model pretraining to enhance scalability and generalization.

## REFERENCES

- E. Abbasi and M. R. Hooshmandasl. Semi-explicit mixture of experts based on information table. *Journal of Ambient Intelligence and Humanized Computing*, 14(7):8409–8420, November 2021. ISSN 1868-5145. doi: 10.1007/s12652-021-03607-w. URL <http://dx.doi.org/10.1007/s12652-021-03607-w>.
- Elham Abbasi, Mohammad Ebrahim Shiri, and Mehdi Ghatee. A regularized root-quartic mixture of experts for complex classification problems. *Knowledge-Based Systems*, 110:98–109, October 2016. ISSN 0950-7051. doi: 10.1016/j.knosys.2016.07.018. URL <http://dx.doi.org/10.1016/j.knosys.2016.07.018>.
- Ahed Alboody and Rim Slama. Ept-moe: Toward efficient parallel transformers with mixture-of-experts for 3d hand gesture recognition. In *Proceedings of the 10th World Congress on Electrical Engineering and Computer Systems and Science*, EECSS 2024. Avestia Publishing, August 2024. doi: 10.11159/mvml24.105. URL <http://dx.doi.org/10.11159/mvml24.105>.
- Ahed Alboody and Rim Slama. *PMoET: Going Wider Than Deeper Using the Parallel Mixture of Experts Transformer for 3D Hand Gesture Recognition*, pp. 83–97. Springer Nature Switzerland, 2025. ISBN 9783031821561. doi: 10.1007/978-3-031-82156-1\_7. URL [http://dx.doi.org/10.1007/978-3-031-82156-1\\_7](http://dx.doi.org/10.1007/978-3-031-82156-1_7).
- Szymon Antoniak, Michał Krutul, Maciej Pióro, Jakub Krajewski, Jan Ludziejewski, Kamil Ciebiera, Krystian Król, Tomasz Odrzygóźdź, Marek Cygan, and Sebastian Jaszczur. Mixture of tokens: Continuous moe through cross-example aggregation, 2024. URL <https://arxiv.org/abs/2310.15961>.
- Antreas Antoniou, Harrison Edwards, and Amos Storkey. How to train your maml, 2019. URL <https://arxiv.org/abs/1810.09502>.
- Jesús-Arnulfo Barradas-Palmeros, Carlos-Alberto López-Herrera, Héctor-Gabriel Acosta-Mesa, and Efrén Mezura-Montes. *Efficient Neural Architecture Search: Computational Cost Reduction Mechanisms in DeepGA*, pp. 125–134. Springer Nature Switzerland, 2025. ISBN 9783031838828. doi: 10.1007/978-3-031-83882-8\_12. URL [http://dx.doi.org/10.1007/978-3-031-83882-8\\_12](http://dx.doi.org/10.1007/978-3-031-83882-8_12).
- Zicheng Cai, Lei Chen, Peng Liu, Tongtao Ling, and Yutao Lai. Eg-nas: Neural architecture search with fast evolutionary exploration. *Proceedings of the AAAI Conference on Artificial Intelligence*, 38(10):11159–11167, March 2024. ISSN 2159-5399. doi: 10.1609/aaai.v38i10.28993. URL <http://dx.doi.org/10.1609/aaai.v38i10.28993>.
- Kabir Chakraborty and Abhijit Chakrabarti. *Classification of Voltage Security States Using Unsupervised ANNs*, pp. 153–173. Springer India, 2015. ISBN 9788132223078. doi: 10.1007/978-81-322-2307-8\_7. URL [http://dx.doi.org/10.1007/978-81-322-2307-8\\_7](http://dx.doi.org/10.1007/978-81-322-2307-8_7).
- Xi Chen, Josip Djolonga, Piotr Padlewski, Basil Mustafa, Soravit Changpinyo, Jialin Wu, Carlos Riquelme Ruiz, Sebastian Goodman, Xiao Wang, Yi Tay, Siamak Shakeri, Mostafa Dehghani, Daniel Salz, Mario Lucic, Michael Tschannen, Arsha Nagrani, Hexiang Hu, Mandar Joshi, Bo Pang, Ceslee Montgomery, Paulina Pietrzyk, Marvin Ritter, AJ Piergiovanni, Matthias Minderer, Filip Pavetic, Austin Waters, Gang Li, Ibrahim Alabdulmohsin, Lucas Beyer, Julien Amelot, Kenton Lee, Andreas Peter Steiner, Yang Li, Daniel Keysers, Anurag Arnab, Yuanzhong Xu, Keran Rong, Alexander Kolesnikov, Mojtaba Seyedhosseini, Anelia Angelova, Xiaohua Zhai, Neil Houlsby, and Radu Soricut. Pali-x: On scaling up a multilingual vision and language model, 2023. URL <https://arxiv.org/abs/2305.18565>.
- Mohammed Nowaz Rabbani Chowdhury, Meng Wang, Kaoutar El Maghraoui, Naigang Wang, Pin-Yu Chen, and Christopher Carothers. A provably effective method for pruning experts in fine-tuned sparse mixture-of-experts, 2024. URL <https://arxiv.org/abs/2405.16646>.
- Yadong Ding, Yu Wu, Chengyue Huang, Siliang Tang, Fei Wu, Yi Yang, Wenwu Zhu, and Yueting Zhuang. Nap: Neural architecture search with pruning. *Neurocomputing*, 477:85–95, March 2022a. ISSN 0925-2312. doi: 10.1016/j.neucom.2021.12.002. URL <http://dx.doi.org/10.1016/j.neucom.2021.12.002>.

- Yadong Ding, Yu Wu, Chengyue Huang, Siliang Tang, Yi Yang, Longhui Wei, Yueting Zhuang, and Qi Tian. Learning to learn by jointly optimizing neural architecture and weights. In *2022 IEEE/CVF Conference on Computer Vision and Pattern Recognition (CVPR)*, pp. 129–138. IEEE, June 2022b. doi: 10.1109/cvpr52688.2022.00023. URL <http://dx.doi.org/10.1109/cvpr52688.2022.00023>.
- Thomas Elsken, Benedikt Staffler, Jan Hendrik Metzen, and Frank Hutter. Meta-learning of neural architectures for few-shot learning. In *2020 IEEE/CVF Conference on Computer Vision and Pattern Recognition (CVPR)*, pp. 12362–12372. IEEE, June 2020. doi: 10.1109/cvpr42600.2020.01238. URL <http://dx.doi.org/10.1109/cvpr42600.2020.01238>.
- István Fehérvári and Wilfried Elmenreich. *Evolution as a Tool to Design Self-organizing Systems*, pp. 139–144. Springer Berlin Heidelberg, 2014. ISBN 9783642541407. doi: 10.1007/978-3-642-54140-7\_12. URL [http://dx.doi.org/10.1007/978-3-642-54140-7\\_12](http://dx.doi.org/10.1007/978-3-642-54140-7_12).
- Sibo Gai and Donglin Wang. Sparse model-agnostic meta-learning algorithm for few-shot learning. In *2019 2nd China Symposium on Cognitive Computing and Hybrid Intelligence (CCHI)*, pp. 127–130. IEEE, September 2019. doi: 10.1109/cchi.2019.8901909. URL <http://dx.doi.org/10.1109/cchi.2019.8901909>.
- Jifeng Guo, C. L. Philip Chen, Zhulin Liu, and Xixin Yang. Dynamic neural network structure: A review for its theories and applications. *IEEE Transactions on Neural Networks and Learning Systems*, 36(3):4246–4266, March 2025. ISSN 2162-2388. doi: 10.1109/tnnls.2024.3377194. URL <http://dx.doi.org/10.1109/tnnls.2024.3377194>.
- Xiaoyu He, Suixiang Shi, Xiulin Geng, and Lingyu Xu. Information-aware attention dynamic synergetic network for multivariate time series long-term forecasting. *Neurocomputing*, 500: 143–154, August 2022. ISSN 0925-2312. doi: 10.1016/j.neucom.2022.04.124. URL <http://dx.doi.org/10.1016/j.neucom.2022.04.124>.
- Chengpeng Hu, Jialin Liu, and Xin Yao. Evolutionary reinforcement learning via cooperative co-evolution, 2024. URL <https://arxiv.org/abs/2404.14763>.
- Lan Huang, Shiqi Sun, Jia Zeng, Wencong Wang, Wei Pang, and Kangping Wang. U-darts: Uniform-space differentiable architecture search. *Information Sciences*, 628:339–349, May 2023. ISSN 0020-0255. doi: 10.1016/j.ins.2023.01.129. URL <http://dx.doi.org/10.1016/j.ins.2023.01.129>.
- Narumitsu Ikeda, Dai Akita, and Hirokazu Takahashi. Noise and spike-time-dependent plasticity drive self-organized criticality in spiking neural network: Toward neuromorphic computing. *Applied Physics Letters*, 123(2), July 2023. ISSN 1077-3118. doi: 10.1063/5.0152633. URL <http://dx.doi.org/10.1063/5.0152633>.
- W. Zhu J. Hao. Architecture self-attention mechanism: nonlinear optimization for neural architecture search. *Journal of Nonlinear and Variational Analysis*, 5(1):119–140, 2021. ISSN 2560-6778. doi: 10.23952/jnva.5.2021.1.08. URL <http://dx.doi.org/10.23952/jnva.5.2021.1.08>.
- Woojeong Jin, Maziar Sanjabi, Shaoliang Nie, Liang Tan, Xiang Ren, and Hamed Firooz. Modality-specific distillation. In Amir Zadeh, Louis-Philippe Morency, Paul Pu Liang, Candace Ross, Ruslan Salakhutdinov, Soujanya Poria, Erik Cambria, and Kelly Shi (eds.), *Proceedings of the Third Workshop on Multimodal Artificial Intelligence*, pp. 42–53, Mexico City, Mexico, June 2021. Association for Computational Linguistics. doi: 10.18653/v1/2021.maiworkshop-1.7. URL <https://aclanthology.org/2021.maiworkshop-1.7/>.
- Kamal Kant Joshi and K. Kokulavani. Adaptive self-evolving neural networks a meta-learning approach for continual lifelong learning in dynamic environments. *SSRN Electronic Journal*, 2025. ISSN 1556-5068. doi: 10.2139/ssrn.5142382. URL <http://dx.doi.org/10.2139/ssrn.5142382>.

- Ma Junchi, Hassan Nazeer Chaudhry, Farzana Kulsoom, Yang Guihua, Sajid Ullah Khan, Su-jit Biswas, Zahid Ullah Khan, and Faheem Khan. Multicausenet temporal attention for multimodal emotion cause pair extraction. *Scientific Reports*, 15(1), June 2025. ISSN 2045-2322. doi: 10.1038/s41598-025-01221-w. URL <http://dx.doi.org/10.1038/s41598-025-01221-w>.
- Douwe Kiela, Hamed Firooz, Aravind Mohan, Vedanuj Goswami, Amanpreet Singh, Pratik Ring-shia, and Davide Testuggine. The hateful memes challenge: Detecting hate speech in multimodal memes, 2021. URL <https://arxiv.org/abs/2005.04790>.
- Krishnateja Killamsetty, Changbin Li, Chen Zhao, Feng Chen, and Rishabh Iyer. A nested bi-level optimization framework for robust few shot learning. *Proceedings of the AAAI Conference on Artificial Intelligence*, 36(7):7176–7184, June 2022. ISSN 2159-5399. doi: 10.1609/aaai.v36i7.20678. URL <http://dx.doi.org/10.1609/aaai.v36i7.20678>.
- Sanghwan Kim, Rui Xiao, Mariana-Iuliana Georgescu, Stephan Alaniz, and Zeynep Akata. Cosmos: Cross-modality self-distillation for vision language pre-training, 2025. URL <https://arxiv.org/abs/2412.01814>.
- Ranjay Krishna, Yuke Zhu, Oliver Groth, Justin Johnson, Kenji Hata, Joshua Kravitz, Stephanie Chen, Yannis Kalantidis, Li-Jia Li, David A. Shamma, Michael S. Bernstein, and Fei-Fei Li. Visual genome: Connecting language and vision using crowdsourced dense image annotations, 2016. URL <https://arxiv.org/abs/1602.07332>.
- Ranjay Krishna, Yuke Zhu, Oliver Groth, Justin Johnson, Kenji Hata, Joshua Kravitz, Stephanie Chen, Yannis Kalantidis, Li-Jia Li, David A. Shamma, Michael S. Bernstein, and Li Fei-Fei. Visual genome: Connecting language and vision using crowdsourced dense image annotations. *International Journal of Computer Vision*, 123:32–73, 2017. doi: 10.1007/s11263-016-0981-7. URL <https://doi.org/10.1007/s11263-016-0981-7>.
- Alina Kuznetsova, Hassan Rom, Neil Alldrin, Jasper Uijlings, Ivan Krasin, Jordi Pont-Tuset, Shahab Kamali, Stefan Popov, Matteo Mallocci, Alexander Kolesnikov, Tom Duerig, and Vittorio Ferrari. The open images dataset v4: Unified image classification, object detection, and visual relationship detection at scale. *International Journal of Computer Vision*, 128(7):1956–1981, March 2020. ISSN 1573-1405. doi: 10.1007/s11263-020-01316-z. URL <http://dx.doi.org/10.1007/s11263-020-01316-z>.
- Tao Li, Kaijun Wu, Mingjun Yan, Zhengnan Liu, and Huan Zheng. Stochastic dynamic behavior of fitzhugh–nagumo neurons stimulated by white noise. *International Journal of Modern Physics B*, 35(10):2150137, April 2021. ISSN 1793-6578. doi: 10.1142/s021797922150137x. URL <http://dx.doi.org/10.1142/s021797922150137x>.
- Yangyang Li, Guanlong Liu, Ronghua Shang, and Licheng Jiao. Meta knowledge assisted evolutionary neural architecture search, 2025. URL <https://arxiv.org/abs/2504.21545>.
- Dongze Lian, Yin Zheng, Yintao Xu, Yanxiong Lu, Leyu Lin, Peilin Zhao, Junzhou Huang, and Shenghua Gao. Towards fast adaptation of neural architectures with meta learning. In *International Conference on Learning Representations*, 2020. URL <https://openreview.net/forum?id=rleowANFvr>.
- Derek Lim, Haggai Maron, Marc T. Law, Jonathan Lorraine, and James Lucas. Graph metanetworks for processing diverse neural architectures, 2023. URL <https://arxiv.org/abs/2312.04501>.
- Heechul Lim and Min-Soo Kim. Tenas: Using taylor expansion and channel-level skip connection for neural architecture search. *IEEE Access*, 10:84790–84798, 2022. ISSN 2169-3536. doi: 10.1109/access.2022.3195208. URL <http://dx.doi.org/10.1109/access.2022.3195208>.
- Tsung-Yi Lin, Michael Maire, Serge Belongie, Lubomir Bourdev, Ross Girshick, James Hays, Pietro Perona, Deva Ramanan, C. Lawrence Zitnick, and Piotr Dollár. Microsoft coco: Common objects in context, 2015. URL <https://arxiv.org/abs/1405.0312>.

- Hanxiao Liu, Karen Simonyan, and Yiming Yang. Darts: Differentiable architecture search, 2019. URL <https://arxiv.org/abs/1806.09055>.
- Jiadong Liu. Comparative study of neural architecture search methods: Random search, rnn + reinforcement learning, and evolutionary algorithms on cifar-10. *IET Conference Proceedings*, 2025(2):32–37, April 2025. ISSN 2732-4494. doi: 10.1049/icp.2025.1009. URL <http://dx.doi.org/10.1049/icp.2025.1009>.
- Vasco Lopes and Luís A. Alexandre. Toward less constrained macro-neural architecture search. *IEEE Transactions on Neural Networks and Learning Systems*, 36(2):2854–2868, February 2025. ISSN 2162-2388. doi: 10.1109/tnnls.2023.3326648. URL <http://dx.doi.org/10.1109/tnnls.2023.3326648>.
- Benteng Ma, Yanning Zhang, and Yong Xia. Momentum recursive darts. *Pattern Recognition*, 156: 110710, December 2024. ISSN 0031-3203. doi: 10.1016/j.patcog.2024.110710. URL <http://dx.doi.org/10.1016/j.patcog.2024.110710>.
- Alexander Mathews, Lexing Xie, and Xuming He. Senticap: Generating image descriptions with sentiments, 2015. URL <https://arxiv.org/abs/1510.01431>.
- Jingbiao Mei, Jinghong Chen, Guangyu Yang, Weizhe Lin, and Bill Byrne. Robust adaptation of large multimodal models for retrieval augmented hateful meme detection, 2025. URL <https://arxiv.org/abs/2502.13061>.
- Bernd Meyer, Cedrick Ansorge, and Toshiyuki Nakagaki. The role of noise in self-organized decision making by the true slime mold physarum polycephalum. *PLOS ONE*, 12(3):e0172933, March 2017. ISSN 1932-6203. doi: 10.1371/journal.pone.0172933. URL <http://dx.doi.org/10.1371/journal.pone.0172933>.
- Li Mi, Syrielle Montariol, Javiera Castillo-Navarro, Xianjie Dai, Antoine Bosselut, and Devis Tuia. Convqg: Contrastive visual question generation with multimodal guidance, 2024. URL <https://arxiv.org/abs/2402.12846>.
- Jiwoo Mun, Seokhyeon Ha, and Jungwoo Lee. De-darts: Neural architecture search with dynamic exploration. *ICT Express*, 9(3):379–384, June 2023. ISSN 2405-9595. doi: 10.1016/j.ict.2022.04.005. URL <http://dx.doi.org/10.1016/j.ict.2022.04.005>.
- Minheng Ni, Haoyang Huang, Lin Su, Edward Cui, Taroon Bharti, Lijuan Wang, Jianfeng Gao, Dongdong Zhang, and Nan Duan. M3p: Learning universal representations via multitask multilingual multimodal pre-training, 2021. URL <https://arxiv.org/abs/2006.02635>.
- H. Ouertatani, C. Maxim, S. Niar, and E-G. Talbi. *Neural Architecture Tuning: A BO-Powered NAS Tool*, pp. 82–93. Springer Nature Switzerland, 2025. ISBN 9783031779411. doi: 10.1007/978-3-031-77941-1\_7. URL [http://dx.doi.org/10.1007/978-3-031-77941-1\\_7](http://dx.doi.org/10.1007/978-3-031-77941-1_7).
- Bryan A. Plummer, Liwei Wang, Chris M. Cervantes, Juan C. Caicedo, Julia Hockenmaier, and Svetlana Lazebnik. Flickr30k entities: Collecting region-to-phrase correspondences for richer image-to-sentence models, 2016. URL <https://arxiv.org/abs/1505.04870>.
- Md Hafizur Rahman, Zafaryab Haider, and Prabuddha Chakraborty. An automated multi parameter neural architecture discovery framework using chatgpt in the backend. *Scientific Reports*, 15(1), May 2025. ISSN 2045-2322. doi: 10.1038/s41598-025-97378-5. URL <http://dx.doi.org/10.1038/s41598-025-97378-5>.
- Piyush Sharma, Nan Ding, Sebastian Goodman, and Radu Soricut. Conceptual captions: A cleaned, hypervised, image alt-text dataset for automatic image captioning. In *Proceedings of ACL*, 2018.
- Amanpreet Singh, Vivek Natarajan, Meet Shah, Yu Jiang, Xinlei Chen, Dhruv Batra, Devi Parikh, and Marcus Rohrbach. Towards vqa models that can read, 2019. URL <https://arxiv.org/abs/1904.08920>.



- Lang Tang, Huixia Li, Chenqian Yan, Xiawu Zheng, and Rongrong Ji. Survey on neural architecture search. *Journal of Image and Graphics*, 26(2):245–264, 2021. ISSN 1006-8961. doi: 10.11834/jig.200202. URL <http://dx.doi.org/10.11834/jig.200202>.
- Bram Van Bolderik, Vlado Menkovski, Sonia Heemstra, and Manil Dev Gomony. Mean: Mixture-of-experts based neural receiver. In *2024 IFIP/IEEE 32nd International Conference on Very Large Scale Integration (VLSI-SoC)*, pp. 1–4. IEEE, October 2024. doi: 10.1109/vlsi-soc62099.2024.10767787. URL <http://dx.doi.org/10.1109/vlsi-soc62099.2024.10767787>.
- Preeti Raj Verma, Navneet Pratap Singh, Deepika Pantola, and Xiaochun Cheng. Neural network developments: A detailed survey from static to dynamic models. *Computers and Electrical Engineering*, 120:109710, December 2024. ISSN 0045-7906. doi: 10.1016/j.compeleceng.2024.109710. URL <http://dx.doi.org/10.1016/j.compeleceng.2024.109710>.
- Wingates Voon, Yan Chai Hum, Yee Kai Tee, Wun-She Yap, Khin Wee Lai, Humaira Nisar, and Hamam Mokayed. Imaml-idcg: Optimization-based meta-learning with imagenet feature reusing for few-shot invasive ductal carcinoma grading. *Expert Systems with Applications*, 257:124969, December 2024. ISSN 0957-4174. doi: 10.1016/j.eswa.2024.124969. URL <http://dx.doi.org/10.1016/j.eswa.2024.124969>.
- Aili Wang, Kang Zhang, Haibin Wu, Shiyu Dai, Yuji Iwahori, and Xiaoyu Yu. Noise-disruption-inspired neural architecture search with spatial-spectral attention for hyperspectral image classification. *Remote Sensing*, 16(17):3123, August 2024. ISSN 2072-4292. doi: 10.3390/rs16173123. URL <http://dx.doi.org/10.3390/rs16173123>.
- Jingxu Wang, Jingda Guo, Ruili Wang, Zhao Zhang, Liyong Fu, and Qiaolin Ye. Parameter disentanglement for diverse representations. *Big Data Mining and Analytics*, 8(3):606–623, 2025. doi: 10.26599/BDMA.2024.9020087.
- Wenhui Wang, Hangbo Bao, Li Dong, Johan Bjorck, Zhiliang Peng, Qiang Liu, Kriti Aggarwal, Owais Khan Mohammed, Saksham Singhal, Subhojit Som, and Furu Wei. Image as a foreign language: Beit pretraining for all vision and vision-language tasks, 2022. URL <https://arxiv.org/abs/2208.10442>.
- Xin Wang and Wenwu Zhu. Advances in neural architecture search. *National Science Review*, 11(8), July 2024. ISSN 2053-714X. doi: 10.1093/nsr/nwae282. URL <http://dx.doi.org/10.1093/nsr/nwae282>.
- Canwen Xu and Julian McAuley. A survey on dynamic neural networks for natural language processing, 2023. URL <https://arxiv.org/abs/2202.07101>.
- Yunqiu Xu, Meng Fang, Ling Chen, Gangyan Xu, Yali Du, and Chengqi Zhang. Reinforcement learning with multiple relational attention for solving vehicle routing problems. *IEEE Transactions on Cybernetics*, 52(10):11107–11120, October 2022. ISSN 2168-2275. doi: 10.1109/tcyb.2021.3089179. URL <http://dx.doi.org/10.1109/tcyb.2021.3089179>.
- Zhou Xun, Liu Songbai, Wong Ka-Chun, Lin Qiuzhen, and Tan Kaychen. A hybrid search method for accelerating convolutional neural architecture search. In *Proceedings of the 2023 15th International Conference on Machine Learning and Computing*, ICMLC 2023, pp. 177–182. ACM, February 2023. doi: 10.1145/3587716.3587745. URL <http://dx.doi.org/10.1145/3587716.3587745>.
- Yibo Yang, Shan You, Hongyang Li, Fei Wang, Chen Qian, and Zhouchen Lin. Towards improving the consistency, efficiency, and flexibility of differentiable neural architecture search. In *2021 IEEE/CVF Conference on Computer Vision and Pattern Recognition (CVPR)*, pp. 6663–6672. IEEE, June 2021. doi: 10.1109/cvpr46437.2021.00660. URL <http://dx.doi.org/10.1109/cvpr46437.2021.00660>.
- Zekang Yang, Wang Zeng, Sheng Jin, Chen Qian, Ping Luo, and Wentao Liu. Nader: Neural architecture design via multi-agent collaboration, 2024. URL <https://arxiv.org/abs/2412.19206>.



Peter Young, Alice Lai, Micah Hodosh, and Julia Hockenmaier. From image descriptions to visual denotations: New similarity metrics for semantic inference over event descriptions. *Transactions of the Association for Computational Linguistics*, 2:67–78, 2014.

Jiahui Yu, Zirui Wang, Vijay Vasudevan, Legg Yeung, Mojtaba Seyedhosseini, and Yonghui Wu. Coca: Contrastive captioners are image-text foundation models, 2022. URL <https://arxiv.org/abs/2205.01917>.

Xinyao Yu, Hao Sun, Ziwei Niu, Rui Qin, Zhenjia Bai, Yen-Wei Chen, and Lanfen Lin. Memory-inspired temporal prompt interaction for text-image classification, 2024. URL <https://arxiv.org/abs/2401.14856>.

Miao Zhang, Steven Su, Shirui Pan, Xiaojun Chang, Ehsan Abbasnejad, and Reza Haffari. idarts: Differentiable architecture search with stochastic implicit gradients, 2021. URL <https://arxiv.org/abs/2106.10784>.

## APPENDIX

### A DIFFERENCE BETWEEN TRADITIONAL NAS AND MALS

Traditional NAS iterates in outer loops, fully retraining candidate architectures between searches. Our proposed framework MALS here interleaves architectural updates with gradient updates using

- Micro-timescale ( $\tau_g$ ): Standard stochastic gradient descent updates the model weights.
- Macro-timescale ( $\tau_a$ ): Every  $k$  gradient steps, the Meta Controller executes an evolutionary adaptation event.

If  $\tau_a \ll \tau_g$ , the architecture can quickly adapt to novel data patterns without overfitting stale topologies. This dual time-scale formalism can be expressed as in Eq. 15.

$$\begin{aligned} \theta_{t+1} &= \theta_t - \eta_g \nabla_{\theta} \mathcal{L}_{task}(\theta_t, \mathcal{M}_t) \\ \mathcal{M}_{t+1} &= \mathcal{F}_{evolve}(\mathcal{M}_t, \pi_{\theta}, \mathcal{H}_t) \quad \text{only if } t \bmod k = 0 \end{aligned} \quad (15)$$

Here,  $\theta$  represents module parameters, and  $\mathcal{F}_{evolve}$  is the learned evolutionary update function.

### B PROBLEM FORMULATION AND ARCHITECTURAL OVERVIEW

#### B.1 NOTATION AND CORE OBJECTS

Let

- $\mathcal{D} = \{(x_i^{(v)}, x_i^{(t)}, y_i)\}_{i=1}^N$  be the dataset of multimodal examples (visual, textual, label), drawn i.i.d. from an unknown distribution  $\mathcal{P}_{data}$ .
- $d$  be the shared latent dimension (we use  $d = 512$  in experiments).
- $\mathcal{A}_t$  denotes the **architecture state** at training step (or epoch)  $t$ .  $\mathcal{A}_t$  comprises:
  - a set of active modules (the **Neural Module Zoo**)  $\mathcal{M}_t = \{m_{t,1}, \dots, m_{t,N_t}\}$ ,
  - router parameters  $\theta_t^{(r)}$ ,
  - module hyperparameter descriptors  $\Theta_t = \{\theta_{t,1}, \dots, \theta_{t,1}\}$  (these describe structural choices like layers, heads, dropout, activation type),
  - global resource counters (parameter count, FLOPs).
- $W_t$  denotes all learnable weights at step  $t$ : module weights, router weights, projection heads, classifier head, and any meta-controller weights (except where separated explicitly).
- $\pi_{\phi}$  denote the **Evolutionary Strategist** (meta-controller) parameterized by  $\phi$ ; it issues discrete/continuous actions that transform  $\mathcal{A}_t \mapsto \mathcal{A}_{t+1}$ .

A single forward pass on sample  $x$  under architecture  $\mathcal{A}_t$  yields prediction  $\hat{y}(x : W_t, \mathcal{A}_t)$ . The per-sample task loss is  $l(\hat{y}, y)$ , e.g. cross-entropy.

**Why this representation?** Treating architecture as an explicit, time-indexed object  $\mathcal{A}_t$  makes it possible to 1) reason about changes over training, 2) define budget constraints that vary over time, and 3) expose  $\pi_{\phi}$  a state on which to condition actions — all necessary for principled co-evolution.

#### B.2 JOINT (BI-LEVEL) OPTIMIZATION: WEIGHTS AND TOPOLOGY

We designed this as a bi-level optimization where weights are optimized continuously while the meta-controller optimizes the architecture trajectory:

$$\begin{aligned} & \text{(Outer / meta)} \quad \min_{\phi} \mathbb{E}[\mathcal{L}_{val}(W_T(\phi), \mathcal{A}_T(\phi))] \\ & \text{subject to} \quad \mathcal{A}_{t+1} \sim \pi_{\phi}(\cdot | s_t), t = 0, \dots, T-1, \\ & \text{(Inner/ weights)} \quad W_{t+1} = \mathcal{U}(W_t, \nabla_{W_t} \mathcal{L}_{train}(W_t, \mathcal{A}_t)), \end{aligned} \quad (16)$$

where:

- $\mathcal{L}_{train}$  and  $\mathcal{L}_{val}$  are empirical train and validation losses,
- $\mathcal{U}$  denotes the inner-loop optimizer (SGD/Adam step),
- $s_t$  is the strategist state,
- expectations are over data sampling and any stochastic components of  $\pi_\phi$ .

**Why a bi-level view?** Architecture decisions change the downstream loss landscape; optimizing  $\phi$  requires evaluating the effect of architectural actions after weight updates. The bi-level view captures this causal dependency. Directly solving this exact bi-level problem is computationally intractable for large models, so we adopt approximations (meta-gradient, reward shaping, and fitness proxies) discussed below.

### B.3 PARAMETRIC PLURALITY: CONFIGURATION SPACES AND MODULE INSTANCING

We define an **archetype set**  $\mathcal{T}$  (e.g., Transformer, LSTM, ResNet, MLP, Squeeze-Excite). For each archetype  $a \in \mathcal{T}$ , we defined a configuration (hyperparameter) space  $\Omega_a$ . A module instance is then:

$$m = (a, \theta^{(arch)}, \omega), \quad \theta^{(arch)} \in \Omega_a, \omega = \text{learned weights} \quad (17)$$

We denoted the probability distribution over configurations as  $P(\theta^{(arch)}|a)$  - the strategist can sample from or choose points in this space.

**Parametric plurality** means for a fixed archetype  $a$ , we allow multiple instances  $\{m_i\}$  with different  $\theta_i^{(arch)}$ . Formally:

$$\mathcal{M}_t = \bigcup_{a \in \mathcal{T}} \{m_{t,i}^{(a)} : \theta_{t,i}^{(arch)} \sim P_t(\cdot|a)\}. \quad (18)$$

**Why?** Because of two main reasons, the first one being that multiple instantiations of the same structural bias with different internal hyperparameters produce distinct inductive priors and optimization dynamics. The second one is reducing reliance on a single optimum configuration for an archetype and enables per-sample specialization via the router.

Here, we quantify module diversity with a metric  $\mathcal{D}(\mathcal{M}_t)$ ,

$$\mathcal{D}(\mathcal{M}_t) = \frac{1}{N_t^2} \sum_{i,j} \Delta(\theta_{t,i}^{(arch)}, \theta_{t,j}^{(arch)}) + \frac{1}{N_t^2} \sum_{i,j} \mathbb{E}_x \|u_{t,i}(x) - u_{t,j}(x)\|_2, \quad (19)$$

where  $\Delta$  measures configuration distance (mixed categorical/continuous) and the second term measures output diversity.

### B.4 ROUTER, CONTRIBUTION, AND THE STRATEGIST STATE

The Graph Attention Router (GAR) produces a per-sample distribution over modules:

$$\alpha(x; \mathcal{A}_t, W_t) = \text{GAR}(f(x; \mathcal{A}_t, W_t), \mathcal{M}_t) \in \Delta^{N_t-1}, \quad (20)$$

and routed representation  $z^{(r)} = \sum_m \alpha_m v_m$ . To make an evolution decision, the strategist receives summary statistics (the **state**  $s_t$ ) that include per-module fitness traces  $\Phi_{t,m}$  (defined in 3.5), module utilization  $\bar{\alpha}_{t,m}$ , resource vector  $c(\mathcal{A}_t)$  (parameter count, FLOPs, latency), global performance indicators and diversity  $\mathcal{D}(\mathcal{M}_t)$ .

**Why these state features?** They connect short-term routing behavior (utilization) with long-term utility (fitness), and expose resource constraints so  $\pi_\phi$  can make capacity-aware decisions (prune low-utility modules, grow when capacity allows).

## B.5 EVOLUTIONARY OPERATORS

The strategist operates via a small set of operators that map architectures to architectures:

- **Prune operator**  $\mathcal{P}_\tau$ : We remove modules  $m$  with  $\Phi_{t,m} < \tau_{prune}$  for  $T_{patience}$  steps.
- **Mutate/Grow operator**  $\mathcal{G}$ : We sampled a parent  $m_p$  (probability proportional to positive fitness) and create child  $m_c$  by:

$$\theta_c^{(arch)} = \theta_p^{(arch)} + \epsilon, \quad \epsilon \sim \mathcal{N}(0, \sigma_{mut}^2), \quad (21)$$

and initialize weights  $\omega_c$  (either random or derived via partial weight inheritance).

- **Hybridization/Crossover operator**  $\mathcal{H}$ : For parents  $m_i, m_j$ , we selected proportional to fitness, and produced a child with mixed hyperparameters:

$$\theta_c^{(arch)} = \text{CROSS}(\theta_i^{(arch)}, \theta_j^{(arch)}), \quad (22)$$

where CROSS handles continuous parameters by convex combination and categorical parameters by probabilistic selection or learned mapping (e.g., one parent chosen per categorical field with probability proportional to fitness).

- **Reinsertion/Assignment**: The newly created modules are inserted into  $\mathcal{M}_t$  if resource budget permits, else they replace low-fitness modules.

The selection probabilities for parents are softmaxed fitness scores:

$$P(m_i, \text{chosen}) = \frac{\exp(\Phi_{t,i}/\tau_{sel})}{\sum_j \exp(\Phi_{t,i}/\tau_{sel})}. \quad (23)$$

**Why these operators?** They emulate biological mechanisms while remaining interpretable and tunable. Crossover blends complementary traits; mutation explores local neighbourhoods; pruning removes dead weight. Soft selection and patience thresholds prevent noisy immediate deletions.

## B.6 CONSTRAINTS AND RESOURCE-AWARE OBJECTIVE

Real systems operate under budgets. Let  $C(\mathcal{A}_t)$  be a vector of costs (parameters, inference latency per sample, memory). The strategist must respect constraints  $C(\mathcal{A}_t) \preceq C_{max}$ . We embedded resource costs into the meta reward so the strategist optimizes utility under budgets. We defined the per-decision reward (to be maximized):

$$r_t = -\mathcal{L}_{val}(W_t, \mathcal{A}_t) - \lambda_c \cdot \text{cost}(C(\mathcal{A}_t)) + \lambda_d \mathcal{D}(\mathcal{M}_t), \quad (24)$$

where  $\text{cost}(\cdot)$  aggregates resource usage into a scalar penalty and  $\mathcal{D}(\cdot)$  is the diversity reward. The outer optimization becomes:

$$\max_{\phi} \mathbb{E}_{\pi_{\phi}} \left[ \sum_{t=0}^{T-1} \gamma_{disc}^t r_t \right]. \quad (25)$$

**Why reward shaping?** Directly minimizing final validation loss is costly to estimate. A dense reward combining validation performance, resource penalties, and diversity fosters architectures that generalize, are efficient, and preserve pluralism.

**Replay memory and stability** Architecture changes introduce non-stationarity. To stabilize training, we maintain a replay buffer  $\mathcal{R}$  storing representative samples (and their labels). When a module changes (spawned, hybridized), we interleave replay training on  $\mathcal{R}$  to preserve past capabilities:

$$W_{t+1} \leftarrow \mathcal{U}(w_t, \nabla_{W_t} [\mathcal{L}_{train}(W_t, \mathcal{B}) + \mu \mathcal{L}_{replay}(W_t, \mathcal{R})]). \quad (26)$$

This is important as replay mitigates catastrophic forgetting when architecture topology changes and modules are inserted/removed. It also provides a stable baseline for computing module utility.

## B.7 PRACTICAL APPROXIMATIONS AND ALGORITHMIC SUMMARY

Solving the exact bi-level is impractical. Therefore, we adopted these approximations:

1. **Local fitness proxies:** We used  $\Phi_{t,m}$  instead of full retraining-based evaluation for parent selection.
2. **Policy optimization:** We trained  $\pi_\phi$  with reinforcement learning (PPO/actor-critic) using the dense reward  $r_t$ .
3. **Warm-start and patience:** We delayed pruning/hybridization for  $E_{warm}$  epochs to allow modules and router to stabilize.
4. **Deterministic operations at eval time:** We sparsified via deterministic top-K for reproducible inference.

**Algorithmically.** We alternated inner-loop updates of  $W_t$  (with replay) with occasional strategist decision steps that apply  $\mathcal{P}, \mathcal{G}, \mathcal{H}$  based on  $\Phi$  and  $s_t$ . The GAR provides per-sample routing and the contribution traces that ground evolutionary choices.

## C MULTIMODAL FEATURE EXTRACTION

Let the input pair be  $(x^{(t)}, x^{(v)})$ , where  $x^{(t)} \in \mathcal{X}$ , denotes a sequence of text tokens and  $x^{(v)} \in \mathcal{X}_v$  denotes an image decomposed into visual patches. Our objective is to map these heterogeneous modalities into a shared latent manifold  $\mathcal{Z} \subseteq \mathbb{R}^d$ , enabling subsequent cross-modal alignment and adaptive modular routing.

### C.1 TEXTUAL ENCODING

We tokenize the text sequence as

$$x^{(t)} = \{w_1, w_2, \dots, w_{L_t}\}, \quad w_i \in \mathcal{V}, \quad (27)$$

where  $\mathcal{V}$  is the vocabulary. A pretrained DistilBERT encoder  $f_t : \mathcal{X}_t \in \mathbb{R}^{L_t \times d_t}$  produces contextualized embeddings:

$$h^{(t)} = f_t(x^{(t)}), \quad h^{(t)} = [h_1^{(t)}, h_2^{(t)}, \dots, h_{L_t}^{(t)}], \quad h_i^{(t)} \in \mathbb{R}^{d_t}. \quad (28)$$

We applied a statistical pooling operator  $\phi_t$  that preserves both mean and covariance structure:

$$\mu^{(t)} = \frac{1}{L_t} \sum_{i=1}^{L_t} h_i^{(t)}, \quad \Sigma^{(t)} = \frac{1}{L_t} \sum_{i=1}^{L_t} (h_i^{(t)} - \mu^{(t)})(h_i^{(t)} - \mu^{(t)})^\top \quad (29)$$

A low-rank factorization (Nyström approximation) compresses covariance into a vector:

$$c^{(t)} = \text{vec}(U_k^\top \sum_{k=1}^{(t)} U_k), \quad U_k \in \mathbb{R}^{d_t \times k}. \quad (30)$$

Thus, the final text embedding is

$$z^{(t)} = W_t \begin{bmatrix} \mu^{(t)} \\ c^{(t)} \end{bmatrix}, \quad z^{(t)} \in \mathbb{R}^d \quad (31)$$

## C.2 VISUAL ENCODING

We partition an image into  $L_v$  patches:

$$x^{(v)} = \{p_1, p_2, \dots, p_{L_v}\}, \quad p_j \in \mathbb{R}^{h \times w \times c}. \quad (32)$$

A pretrained CLIP-ViT encoder  $f_v : \mathcal{X}_v \rightarrow \mathbb{R}^{L_v \times d_v}$  yields patch embeddings using:

$$h^{(v)} = f_v(x^{(v)}), \quad h^{(v)} = [h_1^{(v)}, h_2^{(v)}, \dots, h_{L_v}^{(v)}], \quad h_j^{(v)} \in \mathbb{R}^{d_v}. \quad (33)$$

Similar to the text above, we define

$$\mu^{(v)} = \frac{1}{L_v} \sum_{j=1}^{L_v} h_j^{(v)}, \quad \sum^{(v)} = \frac{1}{L_v} \sum_{j=1}^{L_v} (h_j^{(v)} - \mu^{(v)})(h_j^{(v)} - \mu^{(v)})^\top, \quad (34)$$

and compress via low-rank covariance embedding using

$$c^{(v)} = \text{vec}(U_k^\top \sum^{(v)} U_k). \quad (35)$$

The visual representation is then:

$$z^{(v)} = W_v \begin{bmatrix} \mu^{(v)} \\ c^{(v)} \end{bmatrix}, \quad z^{(v)} \in \mathbb{R}^d. \quad (36)$$

## C.3 SHARED LATENT ALIGNMENT

Both the modalities are projected into the shared latent space  $\mathcal{Z}$ :

$$z^{(t)} = P_t(h^{(t)}), \quad z^{(v)} = P_v(h^{(v)}), \quad z^{(t)}, z^{(v)} \in \mathcal{Z}. \quad (37)$$

We enforce distributional proximity between  $(z^{(t)}, z^{(v)})$  using a contrastive alignment term:

$$\mathcal{L}_{align} = -\log \frac{\exp(\text{sim}(z^{(t)}, z^{(v)})/\tau)}{\sum_{(z^{(t)}, z^{(v')})} \exp(\text{sim}(z^{(t)}, z^{(v')})/\tau)}, \quad (38)$$

where  $\text{sim}(\cdot, \cdot)$  is cosine similarity and  $\tau$  a temperature parameter.

## D CROSS-MODAL ATTENTION FUSION

From the above, we obtain projected embeddings as  $z^{(t)} \in \mathbb{R}^{L_t \times d}$ ,  $z^{(v)} \in \mathbb{R}^{L_v \times d}$ , where  $d = 512$ . We construct modality-specific query, key, and value matrices, as:

$$Q^{(v)} = z^{(v)} W_Q^{(v)}, K^{(t)} = z^{(t)} W_K^{(t)}, V^{(t)} = z^{(t)} W_V^{(t)}, \quad (39)$$

with  $W_Q^{(v)}, W_K^{(t)}, W_V^{(t)} \in \mathbb{R}^{d \times d}$ . Next, we defined cross-modal attention from vision to text as:

$$\alpha = \text{softmax} \left( \frac{Q^{(v)} (K^{(t)})^\top}{\sqrt{d}} \right) \in \mathbb{R}^{L_v \times L_t}. \quad (40)$$

Here, each visual token attends to all textual tokens, producing fused representations as  $z^{(f)} = \alpha V^{(t)} \in \mathbb{R}^{L_v \times d}$ . Unlike symmetric co-attention, this asymmetric scheme ensures that visual



grounding is enriched by linguistic semantics while avoiding representation dilution from treating both modalities equivalently. For robustness, we extended to a multi-head formulation using

$$z^{(f)} = \bigoplus_{h=1}^H z_h^{(f)}, \quad z_h^{(f)} = \alpha_h V_h^{(t)}, \quad (41)$$

Thus, the fused representation is a concatenation of head-specific semantic refinements. To prevent dominance of either modality, we introduced a modality gating mechanism. The scalar gate here is defined as:

$$g = \sigma(w^\top [\text{mean}(z^{(v)}), \text{mean}(z^{(t)})]), \quad (42)$$

where  $g \in (0, 1)$ . The final fusion is a convex combination:

$$z^{(cm)} = g \cdot \text{mean}(z^{(f)}) + (1 - g) \cdot \text{mean}(z^{(t)}). \quad (43)$$

This adaptive gate balances contributions from visual-grounded fusion and raw textual semantics, ensuring stable cross-modal alignment.

## E NEURAL MODULE ZOO AND DYNAMIC ROUTING

**Formal definition.** Let the zoo at time  $t$  contain  $M_t$  active modules:

$$\mathcal{M}_t = \{m_1(\cdot; \theta_1), m_2(\cdot; \theta_2), \dots, m_{M_t}(\cdot; \theta_{M_t})\}. \quad (44)$$

Each module is a parametric function  $m_j : \mathbb{R}^d \rightarrow \mathbb{R}^d, m_j(z^{(f)}; \theta_j) = u_j$ , where  $u_j \in \mathbb{R}^d$  is the output embedding from module  $j$ . Thus, given  $z^{(f)}$ , the zoo produces a candidate set of transformed representations:  $U = [u_1, u_2, \dots, u_{M_t}]^\top \in \mathbb{R}^{M_t \times d}$ .

**Module Families.** The zoo supports multiple **operator families**, each corresponding to distinct inductive biases:

- **MLP modules** (dense projections):

$$m_{MLP}(z^{(f)}; \theta) = \sigma(W_2 \phi(W_1 z^{(f)} + b_1) + b_2), \quad (45)$$

where  $\phi(\cdot)$  is ReLU or GeLU, and  $\sigma(\cdot)$  is a nonlinearity or identity.

- **Transformer modules** (contextual reasoning):

$$m_{Trans}(z^{(f)}; \theta) = \text{MHA}(z^{(f)}) + \text{FFN}(z^{(f)}), \quad (46)$$

where MHA denotes the multi-head attention over  $z^{(f)}$ .

- **LSTM modules** (sequential bias):

$$h_t, c_t = \text{LSTM}(z^{(f)}, h_{t-1}, c_{t-1}; \theta). \quad (47)$$

- **ResNet-style modules** (residual feature refinement):

$$m_{Res}(z^{(f)}; \theta) = z^{(f)} + F(z^{(f)}; \theta), \quad (48)$$

where  $F$  is a stack of nonlinear layers.

- **Squeeze-and-Excitation modules** (channel re-weighting):

$$m_{SE}(z^{(f)}; \theta) = z^{(f)} \odot \sigma(W_2 \phi(W_1 \text{pool}(z^{(f)}))). \quad (49)$$

These families are not fixed, and new families may be introduced during evolution (see subsection 3.5). Next, to encourage **structural diversity**, each module type admits multiple instantiations with distinct hyperparameters using  $\theta_j = \{W_j, b_j, \alpha_j, \dots\}$ , where  $\alpha_j$  represents hyperparameters such as hidden width, number of layers, or dropout rate. Let  $\Omega$  denote the hyperparameter configuration space. Then for a module family  $\mathcal{F}$ :

$$\{m(\cdot; \theta^{(1)}), m(\cdot; \theta^{(2)}), \dots\}, \quad \theta^{(k)} \sim \Omega. \quad (50)$$

This ensures that even within the same operator family, modules exhibit functional non-redundancy, avoiding collapse into homogeneous transformations.

**Theoretical Motivation.** Given  $z^{(f)}$ , an optimal transformation is not known *a priori*. The zoo, therefore, acts as a **basis expansion** of nonlinear operators, where the router learns convex combinations:

$$z^{(r)} = \sum_{j=1}^{M_t} \beta_j m_j(z^{(f)}; \theta_j), \quad \beta_j \geq 0, \sum_j \beta_j = 1. \quad (51)$$

This setup can be viewed as a **functional mixture model**:

$$\mathcal{F}(z^{(f)}) \approx \sum_{j=1}^{M_t} \beta_j m_j(z^{(f)}; \theta_j). \quad (52)$$

By evolving  $\mathcal{M}_t$ , the model dynamically expands the representational capacity, while the router ensures sparse and efficient selection.

## F GRAPH ATTENTION ROUTER

**Notations and Inputs.** Let the Neural Module zoo previously at time  $t$  contain  $N$  active modules  $\mathcal{M}_t = \{m_1, m_2, \dots, m_N\}$ . For a single input sample (or a batch handled elementwise), we denoted the fused embedding (router query) as  $\mathbf{f} \in \mathbb{R}^d$  (from subsection 3.2), and module outputs as  $\mathbf{u}_m \in \mathbb{R}^d$  for  $m = 1 \dots N$ . We stacked them into  $U = [\mathbf{u}_1; \dots; \mathbf{u}_N] \in \mathbb{R}^{N \times d}$ . Next, we implemented multi-head attention with  $H$  heads; index head by  $h$ . Each head uses projection matrices  $W_Q^{(h)}, W_K^{(h)}, W_V^{(h)} \in \mathbb{R}^{d_h \times d}$  with  $d_h = d/H$ .

**Headwise compatibility: relevance + synergy.** For head  $h$ , we computed

$$\mathbf{q}^{(h)} = W_Q^{(h)} \mathbf{f}, \quad \mathbf{k}_m^{(h)} = W_K^{(h)} \mathbf{u}_m, \quad \mathbf{v}_m^{(h)} = W_V^{(h)} \mathbf{u}_m. \quad (53)$$

We defined two components for the per-module compatibility score:

1. **query-to-module relevance** (standard scaled dot-product):

$$r_m^{(h)} = \frac{\langle \mathbf{q}^{(h)}, \mathbf{k}_m^{(h)} \rangle}{\sqrt{d_h}}. \quad (54)$$

2. **module-synergy score** that captures how module  $m$  complements other modules for this input. We compute a learned module affinity via scaled dot-products on keys:

$$S_{m,j}^{(h)} = \frac{\langle \mathbf{k}_m^{(h)}, \mathbf{k}_j^{(h)} \rangle}{\sqrt{d_h}} \quad (j = 1 \dots N). \quad (55)$$

**Algorithm 1** GAR Forward & Bookkeeping (per batch)

---

**Require:** Fused embeddings  $\{f^{(i)}\}_{i=1}^B$ , module outputs  $U^{(i)}$ , router params  $\theta_r$ , module params  $\{\theta_m\}$

**Ensure:** Router outputs  $\{z^{(r,i)}\}$ , updated running stats  $\{\bar{\alpha}, \Phi\}$

- 1: **for** each sample  $i$  **do**
- 2:   **for** each head  $h$  **do**
- 3:     Compute  $q^{(h)} = W_Q^{(h)} f^{(i)}$ ,  $k_m^{(h)} = W_K^{(h)} u_m^{(i)}$ ,  $v_m^{(h)} = W_V^{(h)} u_m^{(i)}$
- 4:   **end for**
- 5:   Compute  $r_m^{(h)} = \frac{\langle q^{(h)}, k_m^{(h)} \rangle}{\sqrt{d_h}}$
- 6:   Compute  $S_{m,j}^{(h)}$  and  $s_m^{(h)} = r_m^{(h)} + \gamma^{(h)} \cdot \sum_j \text{softmax}(S_{m,*}^{(h)}) \cdot q_{\text{int}}(S_{m,j}^{(h)})$
- 7:    $\alpha_m^{(h)} = \text{softmax}_m(s_m^{(h)})$ ; aggregate  $\alpha_m$  over heads  $\rightarrow \alpha_m$
- 8:   Optionally sparsify  $\alpha \rightarrow \tilde{\alpha}$  (sparsemax or top-K)
- 9:    $z^{(r,i)} = \sum_m \tilde{\alpha}_m \cdot v_m^{\text{agg}}$
- 10: **end for**
- 11: Compute task loss  $\mathcal{L}_{\text{task}}$  using  $\{z^{(r,i)}\}$
- 12: Compute router regularizers  $\mathcal{L}_{\text{ent}}, \mathcal{L}_{\text{load}}, \mathcal{L}_{\text{budget}}$
- 13: Backprop: update  $\theta_r$  and  $\{\theta_m\}$  (with per-module LR scaling)
- 14: **Bookkeeping:**
- 15: **for** each  $m$  **do**
- 16:    $\tilde{U}_{m,t} = \text{mean}_i [\alpha_m^{(i)} \cdot (\text{baseline\_loss}_i - \text{loss}_i)]$
- 17: **end for**
- 18:  $\Phi_m \leftarrow (1 - \eta)\Phi_m + \eta\tilde{U}_{m,t}$
- 19:  $\bar{\alpha}_m \leftarrow (1 - \rho)\bar{\alpha}_m + \rho\text{mean}_i[\alpha_m^{(i)}]$
- 20: Send  $\{\Phi_m, \bar{\alpha}_m\}$  to Evolutionary Strategist

---

The synergy was aggregated for  $m$  as a normalized attention over other modules:

$$s_m^{(h)} = \sum_{j=1}^N \omega_{m,j}^{(h)} \cdot q_{\text{int}}(S_{m,j}^{(h)}), \quad \omega_{m,j}^{(h)} = \frac{\exp(S_{m,j}^{(h)})}{\sum_{k=1}^N \exp(S_{m,k}^{(h)})}. \quad (56)$$

Here,  $q_{\text{int}}(\cdot)$  is an optional nonlinearity (e.g., ReLU or identity) that lets the synergy term be asymmetric and saturating if desired. We combined relevance and synergy linearly (learnable balance):

$$s_m^{(h)}(\mathbf{f}, U) = r_m^{(h)} + \gamma^{(h)} s_m^{(h)}, \quad (57)$$

where  $\gamma^{(h)} \in \mathbb{R}_{\geq 0}$  is a learned (or scheduled) head-wise scalar controlling the emphasis on inter-module synergy.

**Novelty.** The synergy term lets the router prefer modules that not only individually match the query but that form *complementary coalitions* for the current input - capturing pairwise (and via repeated application, higher-order) interactions among experts. This is distinct from class MoE routers that treat modules as independent.

**Multi-head attention and normalized routing weights.** For head  $h$ , we normalized capabilities with softmax over modules:

$$\alpha_m^{(h)} = \frac{\exp(s_m^{(h)})}{\sum_{j=1}^N \exp(s_j^{(h)})}. \quad (58)$$

We aggregated heads into a single routing weight per module (head-averaging or learned projection):

$$\alpha_m = \frac{1}{H} \sum_{h=1}^H \alpha_m^{(h)} \quad \text{or} \quad \alpha = \text{softmax}(W_{agg}[\alpha^{(1)}; \dots; \alpha^{(H)}]), \quad (59)$$

where  $W_{agg}$  projects head-wise vectors to a final distribution is desired. Here, the output of the router is the weighted mixture:

$$\mathbf{z}^{(r)} = \sum_{m=1}^N \alpha_m \cdot \mathbf{v}_m^{agg}, \quad \mathbf{v}_m^{agg} = \frac{1}{H} \sum_{h=1}^H \mathbf{v}_m^{(h)}. \quad (60)$$

This  $\mathbf{z}^{(r)}$  flows to the classification head and participates in standard backpropagation: gradients pass to  $W_V, W_K, W_Q$  and - via  $\mathbf{v}_m$  and  $\mathbf{u}_m$  - to module parameters.

**Controlled sparsity: top-k routing (efficient, capacity-aware).** To enforce the **Max Active Modules** constraint and reduce compute, we designed **Soft**  $\rightarrow$  **Sparse** path, where we computed dense  $\alpha_m$  as above, then apply a differentiable sparsification to keep at most  $K$  modules per sample. Here, we had two practical, differentiable options:

1. **Sparsemax/Entmax:** We replaced softmax with sparsemax/entmax, which produces exact zeros for many entries while remaining subgradient-based and differentiable.
2. **Gumbel-TopK with straight-through (ST) estimator:** We sampled a binary mask  $g_m$  indicating top- $K$  modules (deterministic top-K at inference). During the forward pass, we used hard top-K selection:

$$g_m = \mathbf{1}\{\alpha_m \text{ in top-K}\}, \quad \tilde{\alpha}_m = \frac{g_m \cdot \alpha_m}{\sum_j g_j \cdot \alpha_j} \quad (61)$$

For backprop, we used straight-through, where we propagated gradients to  $\alpha_m$  as if soft selection had been used (or we kept the option of Gumbel-softmax relaxation for a differentiable approximation).

We used (and recommend) sparsemax in training for stable gradients and deterministic top-K at evaluation for reproducibility.

**Router regularizers and losses.** To prevent collapse onto a small subset of modules and to encourage exploration and load balancing, we incorporated three auxiliary terms in router training:

1. **Entropy Regularizer (exploration early in training):**

$$\mathcal{L}_{ent} = -\frac{1}{N} \sum_{m=1}^N \alpha_m \log(\alpha_m). \quad (62)$$

2. **Load-balancing penalty:** We encouraged average router usage  $\tilde{\alpha}_m$  (running mean across samples/batches) to match uniform expectation  $1/N$ :

$$\mathcal{L}_{load} = \sum_{m=1}^N \left( \tilde{\alpha}_m - \frac{1}{N} \right)^2, \quad \tilde{\alpha}_m \leftarrow (1 - \rho) \tilde{\alpha}_m + \rho \mathbb{E}_{batch}[\alpha_m]. \quad (63)$$

3. **Sparsity budget:** If using sparsity, we penalized deviation from target active  $K$  via:

$$\mathcal{L}_{budget} = \left( \frac{1}{N} \sum_{m=1}^N \mathbf{1}\{\alpha_m > 0\} - \frac{K}{N} \right)^2 \quad (64)$$

(or an L1 surrogate on  $\alpha$ ).

## G EVOLUTIONARY STRATEGIST — META-CONTROLLER FOR STRUCTURAL SELF-GROWTH

The **Evolutionary Strategist** is a meta-learning controller that continually modifies the **Neural Module Zoo**  $\mathcal{M}$  during training. It operates at the level of **module genotypes** (architecture + hyperparameters) and **phenotypes** (weights, performance types), and its goal is to maximize long-term validation performance while respecting computation/complexity constraints and encouraging parametric plurality. The strategist combines: (i) an interpretable fitness signal derived from the Graph Attention Router, (ii) a set of genetic operators (prune, mutate, hybridize), and (iii) a policy  $\pi_\phi$  trained with a reinforcement/meta-gradient objective. Below, we define state, actions, fitness, evolution operators, the learning objective for the controller, and practical stabilizers.

**Notation and State Representation.** At discrete evolution decision times  $t \in \{0, T_e, 2T_e, \dots\}$ , the system maintains:

- Module pool:  $\mathcal{M}_t = \{m_1, \dots, m_{N_t}\}$ .
- Each module  $m$  has:
  - genotype (hyperparameters, topology):  $\theta_m$  (e.g., depth, width, dropout, heads, activation type),
  - phenotype (weights):  $w_m$ ,
  - usage/metadata:  $\text{age}_m, \text{params}_m$  (parameter count),  $\text{FLOPs}_m$ ,
  - contribution statistics: tracked variables defined below.
- Global training state  $S_t$  comprises:

$$S_t = \{ \{(\theta_m, w_m, \text{age}_m, \text{params}_m, C_m)\}_{m \in \mathcal{M}_t}, \text{val\_metrics}_{t-\Delta:t}, \text{budget\_remaining} \}, \quad (65)$$

where  $C_m$  is a numeric contribution/fitness proxy.

The controller  $\pi_\phi(a_t|S_t)$  outputs actions  $a_t$  altering  $\mathcal{M}_t$  (prune, spawn/mutate, hybridize, no-op, or other maintenance actions). Actions can be multi-step (e.g., hybridize two parents into one child + spawn).

**Contribution and Fitness Estimation.** A robust, low-variance fitness signal is central. We combine two complementary, efficiently computable signals in each evolution epoch:

### 1. Attention-contribution proxy (router-based)

For module  $m$ , collect the per-batch average routing weight from the Graph Attention router over a recent buffer  $\mathcal{B}$  (the last  $B$  mini-batches):

$$\bar{\beta}_m = \frac{1}{B} \sum_{b \in \mathcal{B}} \beta_m^{(b)}. \quad (66)$$

### 2. Leave-one-out loss impact (performance-proxy)

For a mini-batch  $b$  compute the batch loss with full routing  $\mathcal{L}_{full}^{(b)}$  and the loss with module  $m$  ablated (zeroing or masking its output)  $\mathcal{L}_{-m}^{(b)}$ . We defined per-batch delta:

$$\Delta \ell_m^{(b)} = \mathcal{L}_{-m}^{(b)} - \mathcal{L}_{full}^{(b)}. \quad (67)$$

Positive  $\Delta \ell_m$  indicates the module is helpful. The average over  $\mathcal{B}$ :

$$\overline{\Delta \ell}_m = \frac{1}{B} \sum_{b \in \mathcal{B}} \Delta \ell_m^{(b)}. \quad (68)$$

We combine these into an exponential moving average contribution score  $C_m(t)$ :

$$C_m(t) \leftarrow (1 - \rho)C_m(t-1) + \rho \left( w_\beta \frac{\bar{\beta}_m}{\max_k \bar{\beta}_k} + w_\ell \frac{\max(0, \bar{\Delta}\ell_m)}{\max_k \max(0, \bar{\Delta}\ell_k)} \right), \quad (69)$$

with  $\rho \in (0, 1)$  smoothing factor and weights  $w_\beta, w_\ell$  (0.5 each). Normalization avoids scale issues.  $C_m$  is the primary short-term fitness proxy used by selection and pruning. To encourage novelty and penalize redundancy, we also compute a novelty score:

$$\text{novelty}_m = \frac{1}{N_t - 1} \sum_{k \neq m} \exp(-\gamma_\theta \|\theta_m - \theta_k\|_2^2), \quad (70)$$

and defined a combined fitness:

$$F_m = \alpha_C C_m - \alpha_{\text{cost}} \cdot \text{cost}_m + \alpha_{\text{nov}} (1 - \text{novelty}_m), \quad (71)$$

where  $\text{cost}_m$  is the normalized computational cost (params or FLOPs), and  $\alpha$  are tuning scalars. Lower  $\text{novelty}_m$  (i.e., more dissimilar) increases fitness via  $1 - \text{novelty}$ .

**Selection and Pruning** We removed modules whose long-run contribution is consistently low while respecting stability constraints:

- **Minimum survival age:** a module must survive at least  $A_{\min}$  evolution intervals before being eligible for pruning.
- **Prune condition** (quantile-based):

$$\text{Prune } m \text{ if } F_m \leq Q_q(\{F_k\}_{k \in \mathcal{M}_t}) \text{ and } \text{age}_m \geq A_{\min}, \quad (72)$$

where  $Q_q(\cdot)$  is the  $q$ -th percentile ( $q = 0.15$ ). This avoids threshold tuning across varying pool sizes. Alternatively, a dynamic threshold  $\tau_t = \mu_F - \mathcal{K}\sigma_F$  can be used (recommendation).

When pruning, we first attempt **weight recycling**: if another module has an identical genotype or an identical interface, its weights may be reused or used to initialize new offspring.

**Growth (mutation) operator.** To spawn variants, we sample parent modules according to a softmax over fitness:

$$p_{\text{select}}(m) = \frac{\exp(\eta F_m)}{\sum_k \exp(\eta F_k)}. \quad (73)$$

Given parent  $m_p$  with genotype  $\theta_p$  and weights  $w_p$ , we create child genotype  $\theta_c$  via parameter-space mutation:

- For continuous hyperparameters (dropout, width multipliers):

$$\theta_c^{(i)} = \theta_p^{(i)} \cdot \exp(\sigma_\theta \cdot \epsilon^{(i)}), \quad \epsilon^{(i)} \sim \mathcal{N}(0, 1). \quad (74)$$

- For discrete hyperparameters (number of heads), we applied categorical perturbation (random  $\pm$  step with small probability).

Child weights are initialized by soft inheritance:

$$w_c = \gamma_{\text{inh}} w_p + (1 - \gamma_{\text{inh}}) \mathcal{N}(0, \sigma_w^2). \quad (75)$$

where  $\gamma_{\text{inh}} \in [0, 1]$  controls how much of parent knowledge is retained. This reduces cold-start training and stabilizes learning when the child shares structural motifs with the parent. A growth rate constraint keeps the pool budgeted: at most  $G_{\max}$  new modules per evolution step and  $N_t \leq N_{\max}$ .



**Hybridization (Co-Evolutionary Crossover)** Hybridization recombines structural motifs and hyperparameters from two high-fitness parents  $m_i$  and  $m_j$  to create a child  $m_c$ . We treat module genotypes as graph-structured objects (topology + attributes). Let  $T_m = (V_m, E_m, \Theta_m)$  denote parent  $m$ 's topology graph, node attributes  $\Theta_m$  (layer types, widths, activation), and  $W_m$  the associated weight tensors.

**Crossover operator (motif splice):**

1. **Motif extraction:** We sampled subgraph  $S_i \subseteq T_{m_i}$  and  $S_j \subseteq T_{m_j}$  by selecting contiguous substructures using a size distribution (small-to-medium). We represent these as adjacency and attribute sets.
2. **Interface alignment:** We find interface nodes  $u \in S_i, v \in S_j$  where input/output dimensionalities can be projected. If dims differ, create small projection layers  $P_{in} : \mathbb{R}^{d_1} \rightarrow \mathbb{R}^{d_c}$  and  $P_{out}$  as learned linear maps. This enforces compatibility.
3. **Splice:** We create child topology

$$T_c = (T_{m_i} \setminus S_i) \cup S_j, \quad (76)$$

where  $S_j$  is grafted into  $T_{m_i}$  at matched interfaces. (Symmetric alternatives allowed.)

4. **Hyperparameter recombination:** For scalar attributes in  $\Theta$ , we performed convex interpolation:

$$\theta_c^{(k)} = \lambda \theta_{m_i}^{(k)} + (1 - \lambda) \theta_{m_j}^{(k)}, \quad \lambda \sim \mathcal{U}(0, 1). \quad (77)$$

For categorical attributes, we used parent-sampling with probability proportional to normalized parent fitness.

5. **Weight inheritance mapping:** The parameters for retained subgraphs are copied; for grafted subgraphs, we used soft weight blending where possible:

$$W_c[\text{shared}] = \mathcal{K} W_{m_i}[\text{shared}] + (1 - \mathcal{K}) W_{m_j}[\text{shared}] + \epsilon, \quad (78)$$

and new parameters are initialized as small-noise or adapted from the nearest parent via projection.

This motif-based crossover allows the child to inherit functional building blocks (e.g., a multi-head attention motif with a particular head-to-dimension ratio) and yields architectures not present in the initial search space.

**Controller Optimization** The controller  $\pi_\phi$  must learn when to prune, spawn, and hybridize to maximize long-term validation performance under computation budget  $B$ . We pose this as a constrained expected reward maximization:

$$\max_{\phi} \mathbb{E}_{\tau \sim \pi_\phi} \left[ \sum_{t=0}^T \gamma^t r(S_t, a_t) \right] \quad \text{s.t.} \quad \mathbb{E}_{\tau \sim \pi_\phi} [\text{Cost}(\tau)] \leq B, \quad (79)$$

where  $\tau$  is an evolution trajectory,  $\gamma$  discount factor, and reward  $r$  is computed at evolution intervals. We used a Lagrangian relaxation:

$$\mathcal{J}(\phi, \lambda) = \mathbb{E} \left[ \sum_t \gamma^t r_t - \lambda (\text{Cost}_t - B) \right], \quad (80)$$

and optimize  $\phi$  via policy gradient (e.g., PPO) with gradient estimator:

$$\nabla_{\phi} \mathcal{J} \approx \mathbb{E} \left[ \sum_t \nabla_{\phi} \log \pi_{\phi}(a_t | S_t) \tilde{A}_t \right], \quad (81)$$

**Algorithm 2** Evolutionary Strategist for Neural Module Evolution

---

**Require:** Module set  $\mathcal{M} = \{M_1, \dots, M_K\}$ , fused embeddings  $\mathbf{z} \in \mathbb{R}^d$ , contribution scores  $\alpha_i$ , replay memory  $\mathcal{R}$

**Ensure:** Updated module set  $\mathcal{M}'$

- 1: Initialize policy  $\pi_\theta$  for meta-controller
- 2: **while** training not converged **do**
- 3:   Sample task batch  $\mathcal{B} \sim \mathcal{D}$
- 4:   Compute fused embedding  $\mathbf{z}$
- 5:   Route  $\mathbf{z}$  to modules using GraphAttentionRouter
- 6:   Compute contributions  $\alpha_i = \text{softmax}(\frac{\mathbf{z}^\top \mathbf{k}_i}{\sqrt{d}})$
- 7:   Evaluate task loss  $\mathcal{L}_{task}$  and reward  $R(\mathcal{M}) = -\mathcal{L}_{task} + \lambda H(\alpha)$
- 8:   Store  $(\mathbf{z}, \mathcal{M}, R)$  in replay memory  $\mathcal{R}$
- 9:   {— Evolutionary Update —}
- 10:   **if**  $\alpha_i < \tau_{prune}$  for consecutive  $T$  steps **then** (Pruning Rule)
- 11:     Remove module  $M_i$  from  $\mathcal{M}$
- 12:   **end if**
- 13:   **if**  $R(\mathcal{M}) < \tau_{grow}$  **then**
- 14:     Spawn new module  $M'_j$  with parameters (Growth Rule)
- 15:      $\Theta'_j = \Theta_j + \epsilon, \quad \epsilon \sim \mathcal{N}(0, \sigma^2 I)$
- 16:     Add  $M'_j$  to  $\mathcal{M}$
- 17:   **end if**
- 18:   **if**  $\exists M_p, M_q \in \mathcal{M}$  with high complementarity **then**
- 19:     Generate child  $M_c$  via crossover:
- 20:      $\Theta_c = \eta \Theta_p + (1 - \eta) \Theta_q, \quad \eta \sim \mathcal{U}(0, 1)$  (Hybridization Rule)
- 21:     Add  $M_c$  to  $\mathcal{M}$
- 22:   **end if**
- 23:   {— Meta-Controller Update —}
- 24:   Compute policy gradient:
- 25:    $\nabla_\theta J(\theta) = \mathbb{E}_{\pi_\theta} [\nabla_\theta \log \pi_\theta(a|\mathcal{M}) R(\mathcal{M})]$
- 26:   Update  $\theta \leftarrow \theta + \beta \nabla_\theta J(\theta)$
- 27: **end while**
- 28: **return**  $\mathcal{M}'$

---

where  $\tilde{A}_t$  is an advantage estimate (computed from actual validation metric improvement over a horizon  $H$ ). The reward  $r_t$  is defined as:

$$r_t = \Delta \text{ValMetric}_{t \rightarrow t+H} - \eta_{comp} \Delta \text{Cost}_{t \rightarrow t+H} + \eta_{div} \overline{\text{Novelty}}_{t \rightarrow t+H}, \quad (82)$$

balancing short-term performance gain, computational cost, and architectural novelty. In practice, we set  $H$  to a modest number of training steps to trade off noise vs signal. Alternatively, a meta-gradient approach can be used where action parameters are differentiable (soft choices) and the outer validation loss is differentiated w.r.t.  $\phi$  by unrolling a few inner optimization steps. We recommend policy-gradient (PPO) in experiments for stability and scalability, with meta-gradient used in ablations to evaluate potential improvements.

**Stabilization, replay, and reproducibility.** Structural modifications can destabilize training. We used three stabilizers:

1. **Replay memory  $\mathcal{R}$ :** We maintained a buffer of representative examples (stratified by class/modality) and replay them for  $R$  mini-batches immediately after structural changes. This limits catastrophic forgetting and calibrates newly created modules.
2. **Warm-start fine-tuning:** After spawning/hybridization, child modules are trained with a reduced learning rate  $\eta_{child} = \zeta \eta$  for  $E_{warm}$  steps before making further evolutionary decisions.

3. **Minimum-age and hysteresis:** Modules must remain for  $A_{min}$  epochs to allow their contributions to be reliably estimated; pruning decisions incorporate running variance to prevent thrashing.

For reproducibility, every structural operation (prune/mutate/hybridize) is logged with a 64-bit RNG seed, parent IDs, and a deterministic construction routine. This results in reproducible architecture evolution given the same global initial seed.

## H TRAINING OBJECTIVE

### Notation & Problem Statement.

- Let an architecture (set of active modules and their hyperparameters) be  $A = \{(m, \eta_m)\}_{m \in \mathcal{M}}$ , where  $\eta_m$  are module hyperparameters (depth, heads, dropout, widths), and  $\mathcal{M}$  is the active module index set.
- Let  $\Theta = \{\theta_m\}_{m \in \mathcal{M}}$  denote all module weights plus router and head weights; let  $\theta_{ext}$  denote the multimodal extractor weights (DistilBERT, CLIP-ViT).
- Router produces per-sample soft contributions  $\beta_m(x)$  for sample  $x$ . For a minibatch  $B$ , denote  $\beta_m(B) = \frac{1}{|B|} \sum_{x \in B} \beta_m(x)$ .
- Meta-controller (Evolutionary Strategist) is parameterized by  $\phi$  and implements a policy  $\pi_\phi$  which, at discrete architectural decision times, outputs actions  $a \in \mathcal{A}$  (prune, grow, hybridize, and their parameters).
- Let  $\mathcal{R}$  be the replay buffer (capacity  $N_R$ ).

We cast the training as the following bilevel objective:

$$\begin{aligned} \text{Outer / meta (architectural) objective: } & \max_{\phi} \mathbb{E}_{\tau \sim \pi_{\phi}} [\mathcal{P}_{val}(\Theta^{\tau}, A^{\tau}) - c \cdot \mathcal{C}(A^{\tau})] \\ \text{Inner / param (weights) objective: } & \Theta^{\tau} \approx \arg \min_{\Theta} \mathcal{L}_{train}(\Theta, A^{\tau}; \mathcal{D}_{train}), \end{aligned} \quad (83)$$

where  $\mathcal{P}_{val}$  is a validation performance metric (e.g. AUC),  $\mathcal{C}(A)$  is an architectural cost (parameters, FLOPs), and  $\tau$  denotes a stochastic architecture trajectory induced by  $\pi_{\phi}$ . Because architectures are discrete and evolution is online, we used a hybrid of gradient-based inner training and policy-gradient outer optimization.

**Inner (parameter) loss.** For a minibatch  $B = \{(x, y)\}$ , the *base task loss* is binary cross-entropy:

$$\begin{aligned} \mathcal{L}_{task}(B; \Theta, A) &= \frac{1}{|B|} \sum_{(x, y) \in B} \text{CE}(y, \hat{y}(x; \Theta, A)) \\ \hat{y}(x; \Theta, A) &= \sigma(W_o z^{(r)}(x; \Theta, A)), \end{aligned} \quad (84)$$

where  $z^{(r)}$  is the router’s weighted mixture output. To encourage *per-sample routing diversity* (avoid collapse to a single module), we used an entropy reward on router weights averaged over the batch:

$$\mathcal{L}_{div}(B; \Theta, A) = -\frac{1}{|B|} \sum_{x \in B} \sum_{m \in \mathcal{M}} \beta_m(x) \log \beta_m(x). \quad (85)$$

To encourage *representational orthogonality* between module outputs (parametric plurality beyond mere usage), we included a pairwise cosine-similarity penalty:

$$\mathcal{L}_{orth}(B; \Theta, A) = \frac{2}{|\mathcal{M}|(|\mathcal{M}| - 1)} \sum_{i < j} \left( \frac{\langle u_i(B), u_j(B) \rangle}{\|u_i(B)\| \|u_j(B)\|} \right)^2, \quad (86)$$

where  $u_m(B) = \frac{1}{|B|} \sum_{x \in B} u_m(x)$  is the batch-averaged module output (or one can use per-sample pairwise terms averaged). We penalized *architectural complexity* (to avoid unconstrained growth):

$$\mathcal{L}_{comp}(A) = \alpha_{param} \sum_{m \in \mathcal{M}} \text{params}(m) \cdot g_m, \quad g_m = \min\{1, \text{clip}(\beta_m^{avg}/\epsilon, 0, 1)\}, \quad (87)$$

where  $\beta_m^{avg}$  is a long-run usage estimate and  $g_m$  behaves as a soft gate: rarely used modules incur less cost. To mitigate catastrophic forgetting when the architecture changes, we used *replay loss*:

$$\mathcal{L}_{replay}(\mathcal{R}; \Theta, A) = \frac{1}{|\mathcal{S}|} \sum_{(x,y) \in \mathcal{S} \subset \mathcal{R}} \text{CE}(y, \hat{y}(x; \Theta, A)), \quad (88)$$

with  $\mathcal{S}$  a randomly sampled minibatch from the buffer. Finally, the inner total loss used to update  $\Theta$  is:

$$\mathcal{L}_{train}(B; \Theta, A) = \mathcal{L}_{task} + \lambda_{div} \mathcal{L}_{div} + \lambda_{orth} \mathcal{L}_{orth} + \lambda_{replay} \mathcal{L}_{replay} + \lambda_{comp} \mathcal{L}_{comp} \quad (89)$$

All  $\lambda$ 's are hyperparameters tuned to balance accuracy, diversity, and compactness.  $\Theta$  is updated by standard SGD/Adam steps minimizing  $\mathcal{L}_{train}$ . The router parameters (and extractor finetuning) are included in  $\Theta$  and receive gradients through  $\beta$  and the mixture  $z^{(r)}$ .

**Module Fitness and Contribution Estimator.** The strategist must decide which modules to prune, which to hybridize, and which to use as parents for growth. Decisions rely on a fitness score  $f_m$  per module that reflects usefulness and marginal contribution. We propose a practical estimator that balances fidelity and computation:

#### 1. Usage estimate (fast):

$$u_m^{(t)} = \text{EMA}_\rho(\beta_m(B_t)), \quad (90)$$

an exponential moving average over minibatches with decay  $\rho$ .

#### 2. Marginal contribution (periodic, higher fidelity):

For every  $T_{eval}$  minibatches, we estimated the marginal loss drop of module  $m$  on a small validation probe  $P$ :

$$\Delta \mathcal{L}_m \approx \frac{1}{|P|} \sum_{x \in P} (\mathcal{L}(x; \Theta, A/\{m\}) - \mathcal{L}(x; \Theta, A)), \quad (91)$$

where  $A/\{m\}$  is the architecture with  $m$  ablated (set  $\beta_m = 0$  and renormalize). Positive  $\Delta \mathcal{L}_m$  means the module helps.

#### 3. Composite fitness:

We combine both signals:

$$f_m = \gamma_1 u_m^{(t)} + \gamma_2 \text{ReLU}(\Delta \mathcal{L}_m), \quad (92)$$

normalized across modules.  $\gamma$  weights trade off frequency vs casual contribution.

The strategist prunes modules with  $f_m < \tau_{prune}$  and age  $i, A_{mini}$ ; spawns children from parents sampled proportional to  $f_m$ ; selects parents for hybridization stochastically using fitness-proportionate selection.

**Evolutionary Actions.** Let action set  $\mathcal{A}$  include:

- **prune(m)**: remove module  $m$  permanently (or mark inactive).
- **grow( $p, \delta_\eta$ )**: spawn new module from parent  $p$  with hyperparameter perturbation  $\delta_n$ .
- **hybridize( $p_i, p_j, \lambda$ )**: create child hyperparameters

$$\eta_c = \lambda \eta_{p_i} + (1 - \lambda) \eta_{p_j} + \epsilon, \epsilon \sim \mathcal{N}(0, \sigma^2). \quad (93)$$

**Weight inheritance.** Child weights  $\theta_c$  are warm-started by structured inheritance:

- for hybridization:  $\theta_c = \lambda\theta_{p_i} + (1 - \lambda)\theta_{p_j} + \zeta$ , with small noise  $\zeta \sim \mathcal{N}(0, \sigma_w^2)$ .
- for growth by mutation: copy and perturb parent:  $\theta_c = \theta_p + \zeta$ .  
After creation, children undergo a short warm-up period of  $T_{warm}$  minibatches with a smaller learning rate  $\eta_w$  to prevent destabilization.

**Knowledge distillation on pruning.** Before the pruning module  $m$ , we optionally perform a distillation step so that the remaining modules can absorb its functionality:

$$\mathcal{L}_{kd} = \frac{1}{|S|} \sum_{x \in S} \|z_{full}^{(r)}(x) - z_{ablated}^{(r)}(x)\|_2^2, \quad (94)$$

where  $z_{full}^{(r)}$  uses  $m$  and  $z_{ablated}^{(r)}$  does not. Minimizing  $\mathcal{L}_{kd}$  for a few steps softens the removal.

**Outer (Meta) Objective and Optimization of  $\phi$ .** The strategist parameter  $\phi$  defines a policy  $\pi_\phi(a_t|s_t)$  that, given state  $s_t$  (module fitness vector  $\{f_m\}$ , age, resource usage, recent validation trajectory, etc.), outputs an action distribution. The meta-reward  $r_t$  should encourage long-term validation gains while penalizing cost:

$$r_t = \Delta\mathcal{P}_{val,t} - \eta_{param}\Delta\text{Params}_t - \eta_{flops}\Delta\text{FLOPs}_t - k \cdot \mathcal{C}_{instab,t}, \quad (95)$$

where  $\mathcal{P}_{val,t} = \mathcal{P}_{val}(t + \Delta) - \mathcal{P}_{val}(t)$  is the improvement observed after applying action(s) and letting the model train for a short horizon, and  $\mathcal{C}_{instab,t}$  penalizes validation volatility (to avoid reckless growth that yields unstable gains). We maximized expected return:

$$J(\phi) = \mathbb{E}_{\tau \sim \pi_\phi} \left[ \sum_{t=0}^T r_t \right]. \quad (96)$$

We applied two practical optimization strategies here:

1. **Policy Gradient (REINFORCE).** We used sampled trajectories of length  $T_{meta}$ , estimate returns  $R_t = \sum_{k=t}^T r_k$ , and update:

$$\nabla_\phi J \approx \mathbb{E} \left[ \sum_t \nabla_\phi \log \pi_\phi(a_t|s_t) (R_t - b_t) \right], \quad (97)$$

where  $b_t$  is a learned baseline (value network) to reduce variance. Entropy regularization  $-\lambda_H \sum_t \mathcal{H}(\pi_\phi(\cdot|s_t))$  is added to encourage exploration.

2. **Truncated Meta-Gradient (Differentiable Unroll).** When computational budget allows, we unrolled  $k$  inner optimization steps of  $\Theta$  after an action and differentiate the validation loss w.r.t.  $\phi$  via chain rule (truncated backprop through optimization). Let  $\Theta_{t+k}(\phi)$  denote the inner optimized weights after  $K$  steps influenced by decisions sampled from  $\pi_\phi$ . Then,

$$\nabla_\phi \mathcal{L}_{val}(\Theta_{t+k}(\phi)) = \frac{\partial \mathcal{L}_{val}}{\partial \Theta_{t+k}} \cdot \frac{\partial \Theta_{t+k}}{\partial \phi}, \quad (98)$$

which we compute with automatic differentiation for small  $K$ . This gives lower variance but larger memory/computation. In practice, we combine both: use REINFORCE for long-horizon exploration and occasional truncated meta-gradient updates for fine-tuning.
